# Supplementary material for: Exploration of glassy state in Prussian blue analogues
Source: PubMed Central journal article supplement (PMC9276687; doi:10.1038/s41467-022-31658-w), 2022-07-12
Supplement: 41467_2022_31658_MOESM1_ESM.pdf [file 41467_2022_31658_MOESM1_ESM.pdf]

# Supplementary Information

## Exploration of glassy state in Prussian blue analogues

N. Ma *et al.*

\*Corresponding author. Email: horike@icems.kyoto-u.ac.jp (Satoshi Horike)

### Supplementary Tables

**Supplementary Table 1.** Fe and Cu mass percent of Cu[Fe]<sub>2/3</sub> from Energy Dispersive X-ray Fluorescence (EDXRF).

|    | Mass (%) | Standard deviation | Fe:Cu mol ratio |
|----|----------|--------------------|-----------------|
| Cu | 63.9     | 0.1                | 0.63            |
| Fe | 35.1     | 0.1                |                 |

**Supplementary Table 2.** Room temperature <sup>57</sup>Fe Mössbauer spectral fitting parameters.

|                           | Component         | IS (mm/s) | QS (mm/s) | Fraction (%) |
|---------------------------|-------------------|-----------|-----------|--------------|
| Cu[Fe] <sub>2/3</sub>     | Fe <sup>II</sup>  | -0.088    | 0.179     | 51.1         |
|                           | Fe <sup>III</sup> | -0.159    | 0.556     | 48.9         |
| Cu[Fe] <sub>2/3</sub> -g  | Fe <sup>II</sup>  | -0.088    | 0.168     | 67.0         |
|                           | Fe <sup>III</sup> | 0.258     | 0.790     | 33.0         |
| Cu[Fe] <sub>2/3</sub> -c  | Fe <sup>II</sup>  | -0.086    | 0.143     | 73.5         |
|                           | Fe <sup>III</sup> | 0.318     | 0.727     | 26.5         |
| Cu[Fe] <sub>2/3</sub> -c' | Fe <sup>II</sup>  | -0.083    | 0.172     | 66.9         |
|                           | Fe <sup>III</sup> | 0.309     | 0.745     | 33.1         |

**Supplementary Table 3.** C and N weight percentage of Cu[Fe]<sub>2/3</sub>, Cu[Fe]<sub>2/3-g</sub>, and Cu[Fe]<sub>2/3-c</sub> excluding water content. The values are calculated from elemental analysis.

|                         | Element | Weight (%) | Standard deviation |
|-------------------------|---------|------------|--------------------|
| Cu[Fe] <sub>2/3</sub>   | C       | 23.7       | 0.34               |
|                         | N       | 28.4       | 0.77               |
| Cu[Fe] <sub>2/3-g</sub> | C       | 22.7       | 0.20               |
|                         | N       | 27.0       | 0.56               |
| Cu[Fe] <sub>2/3-c</sub> | C       | 22.2       | 0.51               |
|                         | N       | 26.6       | 0.34               |

**Supplementary Table 4.** Fe K-edge EXAFS data fitting results.

|                         | Path | nleg | Degeneracy | R (Å) | $\sigma^2$ (Å <sup>2</sup> ) | E <sub>0</sub> (eV) |
|-------------------------|------|------|------------|-------|------------------------------|---------------------|
| Cu[Fe] <sub>2/3</sub>   | Fe–C | 2    | 6.0        | 1.93  | 0.004                        | –2.691              |
|                         | Fe–N | 2    | 6.0        | 3.06  | 0.031                        | –2.691              |
|                         | Fe–N | 3    | 12.0       | 3.06  | 0.007                        | –2.691              |
|                         | Fe–N | 4    | 6.0        | 3.06  | 0.005                        | –2.691              |
| Cu[Fe] <sub>2/3-g</sub> | Fe–C | 2    | 4.4        | 1.92  | 0.005                        | –2.797              |
|                         | Fe–N | 2    | 4.4        | 3.01  | 0.027                        | –2.797              |
|                         | Fe–N | 3    | 8.8        | 3.01  | 0.007                        | –2.797              |
|                         | Fe–N | 4    | 4.4        | 3.01  | 0.003                        | –2.797              |
| Cu[Fe] <sub>2/3-c</sub> | Fe–C | 2    | 5.4        | 1.91  | 0.005                        | –4.093              |
|                         | Fe–N | 2    | 5.4        | 3.03  | 0.046                        | –4.093              |
|                         | Fe–N | 3    | 10.8       | 3.03  | 0.012                        | –4.093              |
|                         | Fe–N | 4    | 5.4        | 3.03  | 0.004                        | –4.093              |

**Supplementary Table 5.** Room temperature  $^{57}\text{Fe}$  Mössbauer spectral fitting parameters of  $\text{Fe}[\text{Fe}]_{3/4}$ .

|                              | Component                   | IS (mm/s) | QS (mm/s) | Fraction (%)* |
|------------------------------|-----------------------------|-----------|-----------|---------------|
| $\text{Fe}[\text{Fe}]_{3/4}$ | $\text{Fe}^{\text{II}}$     | -0.143    | 0.118     | 48.1          |
|                              | $\text{Fe}^{\text{III}, a}$ | 0.410     | 0.001     | 17.7          |
|                              | $\text{Fe}^{\text{III}, b}$ | 0.410     | 0.270     | 22.6          |
|                              | $\text{Fe}^{\text{III}, c}$ | 0.410     | 0.627     | 11.6          |

\* $\text{Fe}^{\text{III}}/\text{Fe}^{\text{II}}$  ratio of  $\text{Fe}^{\text{III}}[\text{Fe}^{\text{II}}(\text{CN})_6]_{3/4}\square_{1/4}\cdot n\text{H}_2\text{O}$  measured from  $^{57}\text{Fe}$  Mössbauer spectroscopy is found to range from 0.99 to 1.13 (1.08 for this work) instead of the theoretical value of 1.33 due to the deviation of the  $f$ -factor between  $\text{Fe}^{\text{II}}\text{-C}$  bonding and the average of the  $\text{Fe}^{\text{III}}\text{-N}$ ,  $\text{Fe}^{\text{III}}\text{-O}$ , and  $\text{Fe}^{\text{III}}\text{-vacancy}$  bonding.<sup>1</sup>

**Supplementary Table 6.** C and N weight percentage of  $\text{Fe}[\text{Fe}]_{3/4}$  excluding water content. The values are calculated from elemental analysis.

|                              | Element | Weight (%) | Standard deviation |
|------------------------------|---------|------------|--------------------|
| $\text{Fe}[\text{Fe}]_{3/4}$ | C       | 27.6       | 0.58               |
|                              | N       | 35.5       | 0.55               |

**Supplementary Table 7.** Variations of elasticity for  $\text{Fe}[\text{Fe}(\text{CN})_6] \cdot n\text{H}_2\text{O}$ ,  $\text{Fe}[\text{Fe}(\text{CN})_6]$ , and  $\text{Fe}_4[\text{Fe}(\text{CN})_6]_3 \cdot n\text{H}_2\text{O}$ .

|                        |                                        | $\text{Fe}[\text{Fe}(\text{CN})_6] \cdot n\text{H}_2\text{O}$ | $\text{Fe}[\text{Fe}(\text{CN})_6]$ | $\text{Fe}_4[\text{Fe}(\text{CN})_6]_3 \cdot n\text{H}_2\text{O}$ |
|------------------------|----------------------------------------|---------------------------------------------------------------|-------------------------------------|-------------------------------------------------------------------|
| Young's modulus        | $E_{\text{max}} / \text{GPa}$          | 247.4                                                         | 217.3                               | 169.0                                                             |
|                        | $E_{\text{min}} / \text{GPa}$          | 551.4                                                         | 48.2                                | 48.9                                                              |
|                        | A                                      | 4.8                                                           | 4.5                                 | 3.5                                                               |
| Linear compressibility | $\beta_{\text{max}} / \text{TPa}^{-1}$ | 3.0                                                           | 3.0                                 | 11.8                                                              |
|                        | $\beta_{\text{min}} / \text{TPa}^{-1}$ | 2.7                                                           | 3.0                                 | 6.6                                                               |
|                        | A                                      | 1.1                                                           | 1.0                                 | 1.8                                                               |
| Shear modulus          | $G_{\text{max}} / \text{GPa}$          | 103.7                                                         | 92.4                                | 78.6                                                              |
|                        | $G_{\text{min}} / \text{GPa}$          | 16.7                                                          | 16.9                                | 18.8                                                              |
|                        | A                                      | 6.2                                                           | 5.5                                 | 4.2                                                               |
| Poisson's ratio        | $\nu_{\text{max}}$                     | 0.78                                                          | 0.77                                | 0.58                                                              |
|                        | $\nu_{\text{min}}$                     | 0.03                                                          | 0.05                                | -0.25                                                             |
|                        | A                                      | 29.3                                                          | 16.0                                | $\infty$                                                          |

**Supplementary Table 8.** Density ( $\rho$ ), longitudinal velocity ( $V_L$ ), Vickers hardness at infinite load ( $H_{V,\infty}$ ), reduced elastic modulus ( $E_r$ ) from indentation experiments, and longitudinal modulus ( $L$ ) of Fe[Fe]<sub>3/4</sub>-g and Cu[Fe]<sub>2/3</sub>-g monolith samples as well as transversal velocity ( $V_T$ ), Young's modulus ( $E$ ), shear modulus ( $G$ ), bulk modulus ( $B$ ), and Poisson's ratio ( $\nu$ ) for the Cu[Fe]<sub>2/3</sub>-g monolith. n.d. indicates that property could not be determined.

|                              | Fe[Fe] <sub>3/4</sub> -g | Cu[Fe] <sub>2/3</sub> -g |
|------------------------------|--------------------------|--------------------------|
| $\rho$ (g cm <sup>-3</sup> ) | 2.04                     | 1.95                     |
| $V_L$ (m s <sup>-1</sup> )   | 2950                     | 2891                     |
| $V_T$ (m s <sup>-1</sup> )   | n.d.                     | 1586                     |
| $H_{V,\infty}$ (GPa)         | 0.51                     | 0.46                     |
| $E_r$ (GPa)                  | 7.6                      | 5.7                      |
| $L$ (GPa)                    | 17.8                     | 16.3                     |
| $E$ (GPa)                    | n.d.                     | 12.6                     |
| $G$ (GPa)                    | n.d.                     | 4.9                      |
| $B$ (GPa)                    | n.d.                     | 9.7                      |
| $\nu$ (-)                    | n.d.                     | 0.28                     |

## Supplementary Figures

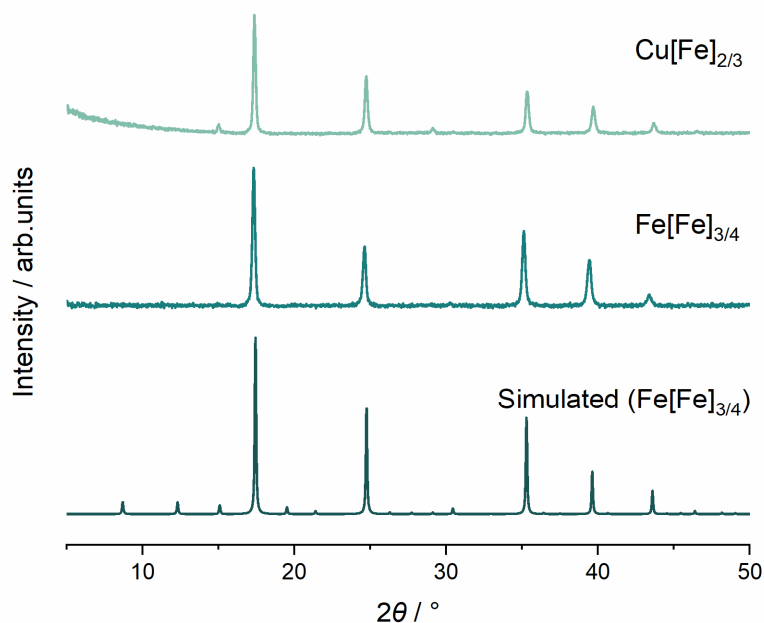

**Supplementary Figure 1.** PXR D patterns of Cu[Fe]<sub>2/3</sub>, Fe[Fe]<sub>3/4</sub>, and simulated Fe[Fe]<sub>3/4</sub> ( $\lambda = 1.5406$  Å). Source data are provided as a Source Data file.

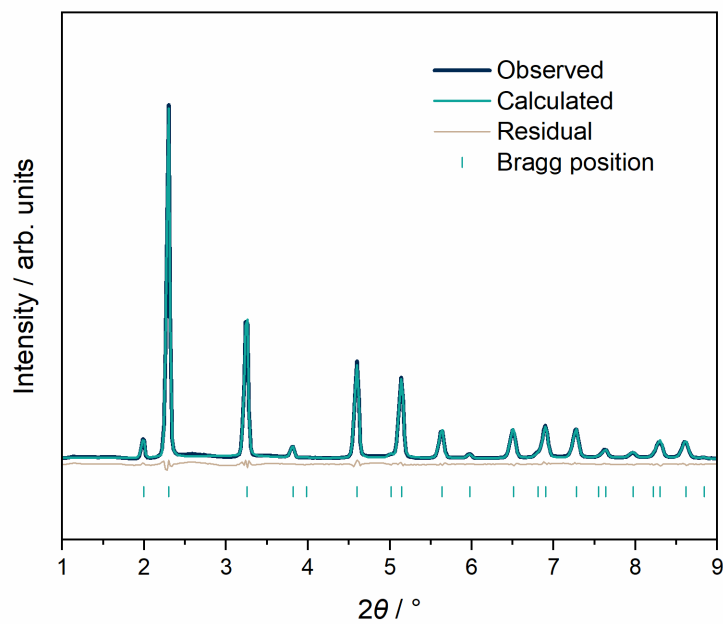

**Supplementary Figure 2.** Rietveld refinement of Cu[Fe]<sub>2/3</sub> ( $\lambda = 0.2020$  Å). Source data are provided as a Source Data file.

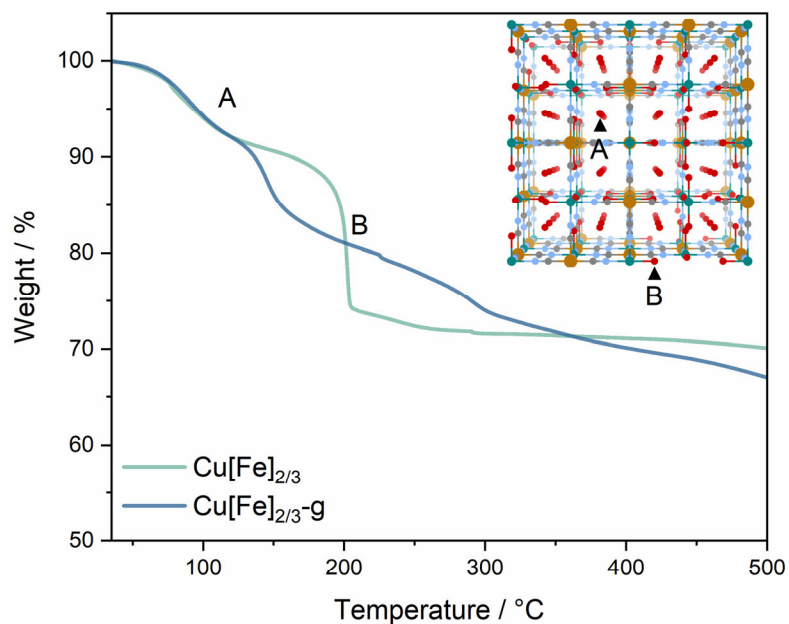

**Supplementary Figure 3.** TGA profiles of  $\text{Cu}[\text{Fe}]_{2/3}$  and  $\text{Cu}[\text{Fe}]_{2/3\text{-g}}$  under Ar ( $10\text{ }^\circ\text{C min}^{-1}$ ). Inset scheme displays (A) zeolitic water and (B) coordinate water. Source data are provided as a Source Data file.

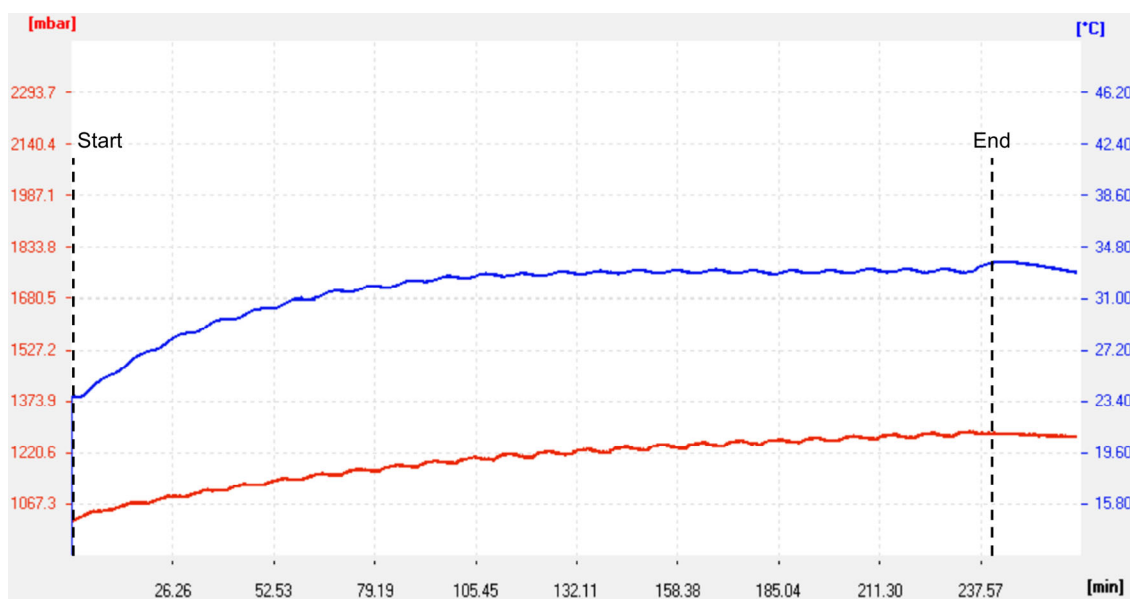

**Supplementary Figure 4.** In situ temperature-probing during the mechanical milling process of  $\text{Cu}[\text{Fe}]_{2/3}$ .

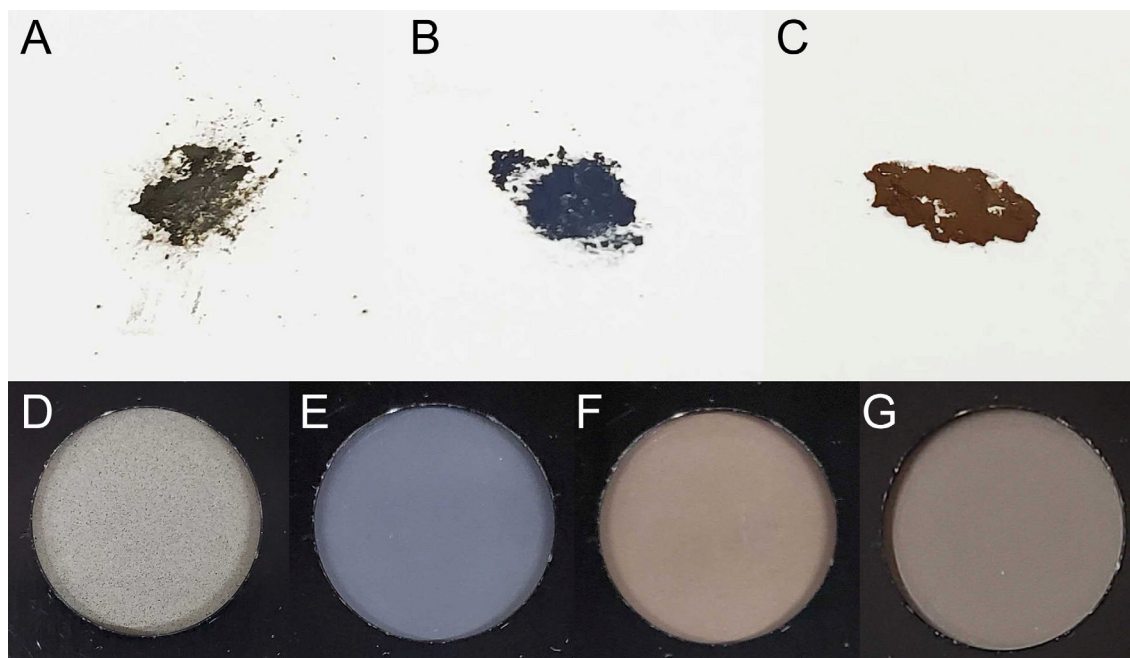

**Supplementary Figure 5.** Optical images of (A)  $\text{Cu[Fe]}_{2/3}$ , (B)  $\text{Cu[Fe]}_{2/3\text{-g}}$ , and (C)  $\text{Cu[Fe]}_{2/3\text{-c}}$  as well as samples mixed with 95 wt%  $\text{CaF}_2$  to emphasise the colour change of (D)  $\text{Cu[Fe]}_{2/3}$ , (E)  $\text{Cu[Fe]}_{2/3\text{-g}}$ , (F)  $\text{Cu[Fe]}_{2/3\text{-c}}$ , and (G)  $\text{Cu[Fe]}_{2/3\text{-c}'}$ .

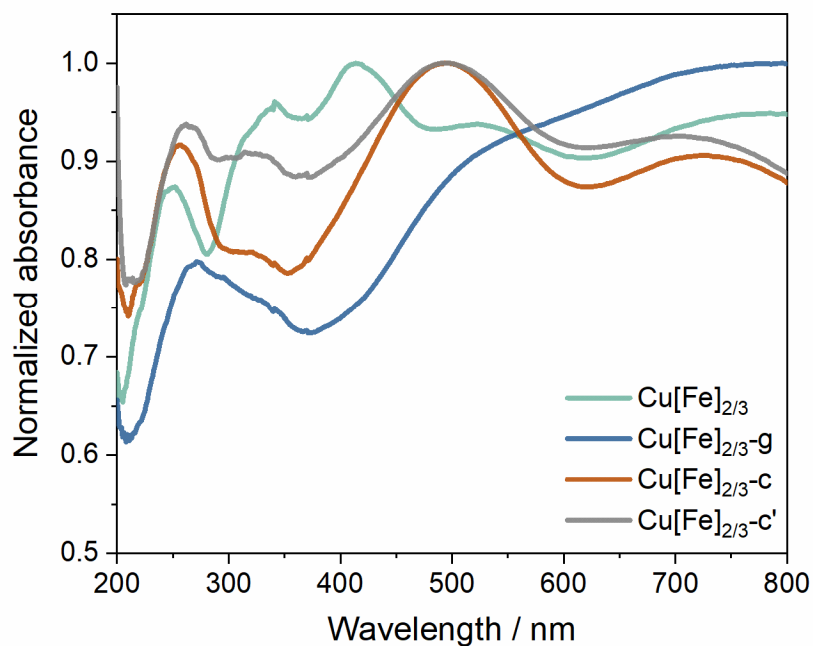

**Supplementary Figure 6.** Diffuse-reflectance UV-Vis spectra of  $\text{Cu[Fe]}_{2/3}$ ,  $\text{Cu[Fe]}_{2/3\text{-g}}$ ,  $\text{Cu[Fe]}_{2/3\text{-c}}$ , and  $\text{Cu[Fe]}_{2/3\text{-c}'}$ . Source data are provided as a Source Data file.



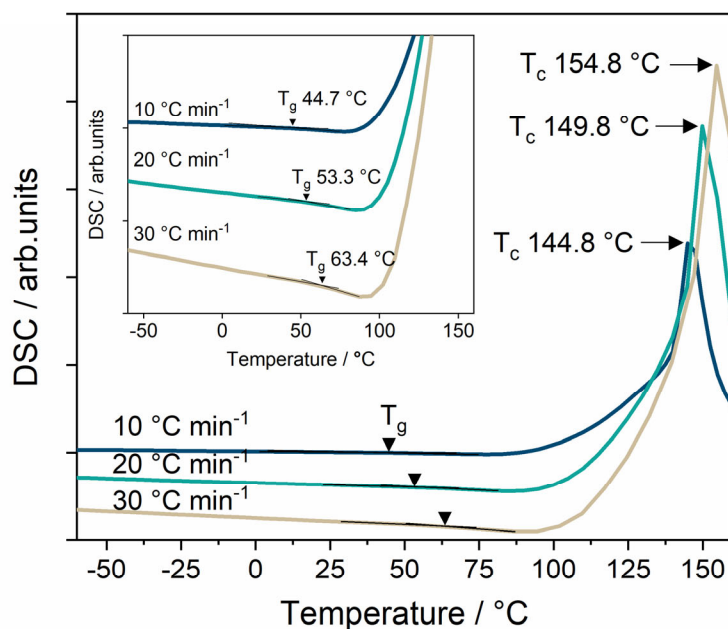

**Supplementary Figure 7.** Close system DSC profiles under Ar atmosphere of  $\text{Cu}[\text{Fe}]_{2/3\text{-g}}$  at the heating rate of 10, 20, and 30  $^{\circ}\text{C min}^{-1}$ . Source data are provided as a Source Data file.

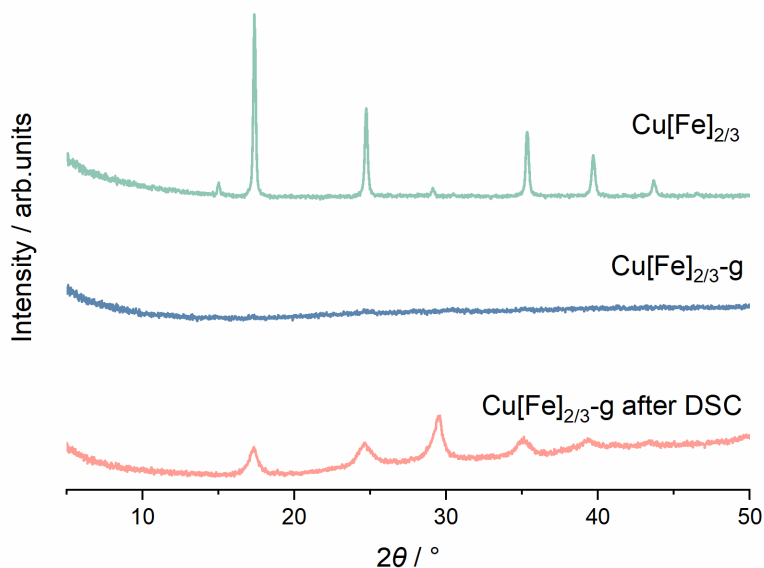

**Supplementary Figure 8.** PXRD patterns of  $\text{Cu}[\text{Fe}]_{2/3}$ ,  $\text{Cu}[\text{Fe}]_{2/3\text{-g}}$ , and  $\text{Cu}[\text{Fe}]_{2/3\text{-g}}$  after DSC measurement ( $\lambda = 1.5406 \text{ \AA}$ ). Source data are provided as a Source Data file.

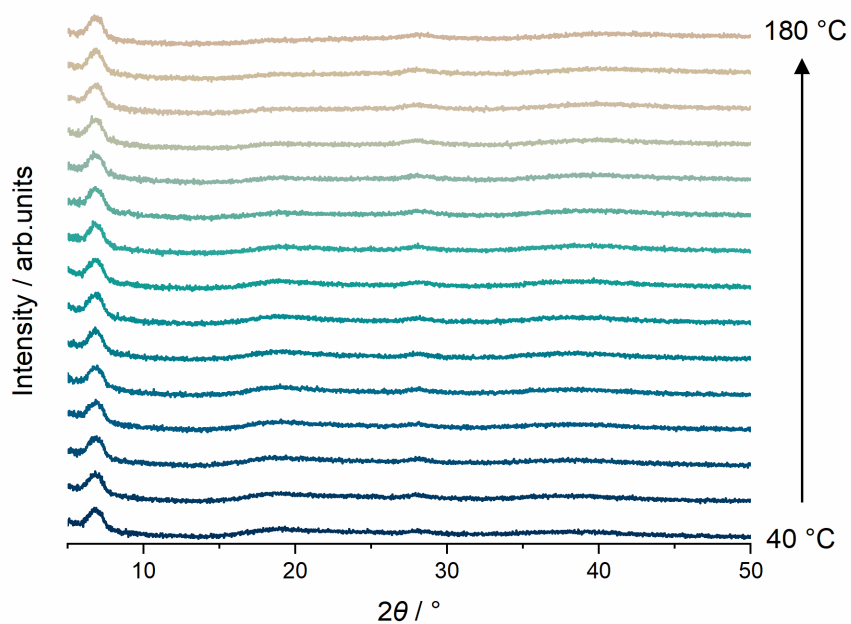

**Supplementary Figure 9.** Ar-flow variable temperature PXRD patterns of  $\text{Cu}[\text{Fe}]_{2/3}\text{-g}$  from 40 to 180 °C ( $\lambda = 1.5406 \text{ \AA}$ ). The temperature was held for 30 min before each measurement. The peak at the  $2\theta$  of  $6.9^\circ$  is corresponding to the cell background. Source data are provided as a Source Data file.

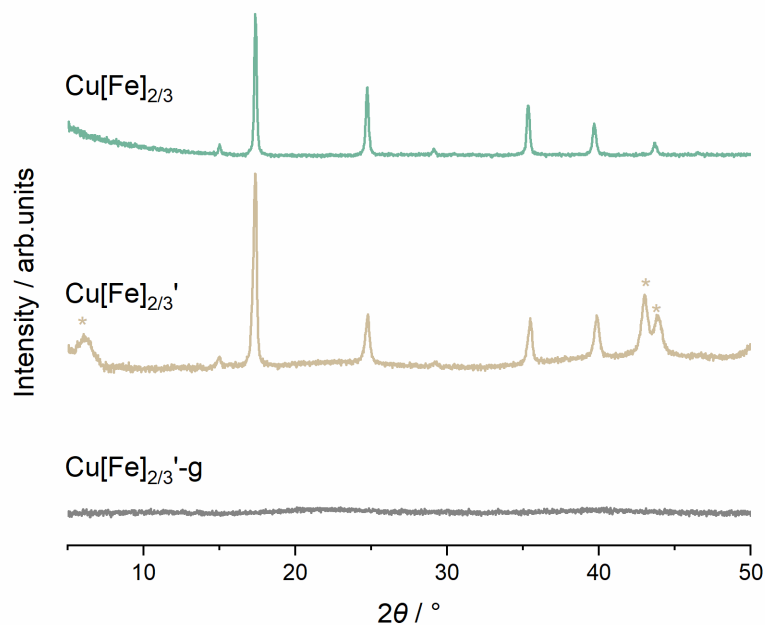

**Supplementary Figure 10.** PXRD patterns of  $\text{Cu}[\text{Fe}]_{2/3}$ ,  $\text{Cu}[\text{Fe}]_{2/3}'$ , and  $\text{Cu}[\text{Fe}]_{2/3}'\text{-g}$ . Peaks with (\*) is corresponding to the Ar cell background ( $\lambda = 1.5406 \text{ \AA}$ ). Source data are provided as a Source Data file.

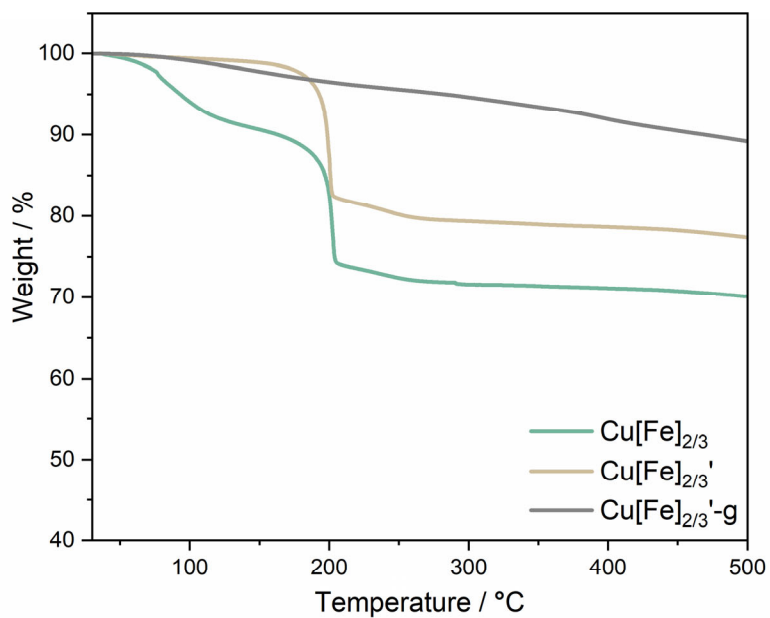

**Supplementary Figure 11.** TGA profiles of  $\text{Cu[Fe]}_{2/3}$ ,  $\text{Cu[Fe]}_{2/3}'$ , and  $\text{Cu[Fe]}_{2/3}'\text{-g}$ . Source data are provided as a Source Data file.

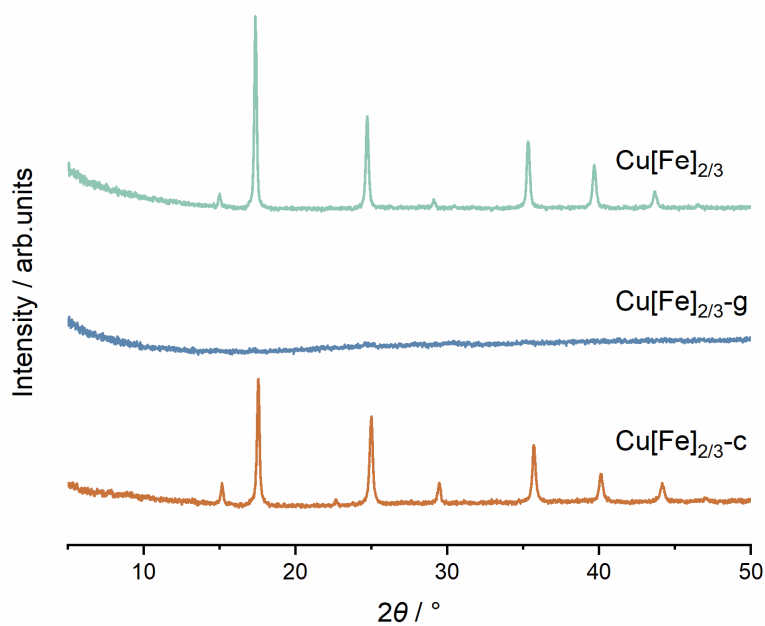

**Supplementary Figure 12.** PXRD patterns of  $\text{Cu[Fe]}_{2/3}$ ,  $\text{Cu[Fe]}_{2/3}\text{-g}$ , and  $\text{Cu[Fe]}_{2/3}\text{-c}$  ( $\lambda = 1.5406 \text{ \AA}$ ). Source data are provided as a Source Data file.

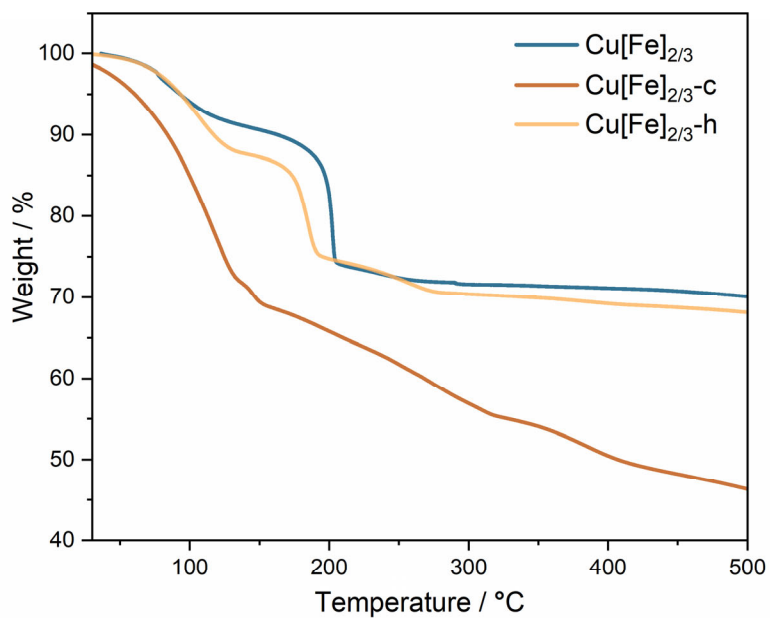

**Supplementary Figure 13.** TGA profiles of Cu[Fe]<sub>2/3</sub>, Cu[Fe]<sub>2/3-c</sub>, and Cu[Fe]<sub>2/3-h</sub>. Note that Cu[Fe]<sub>2/3-h</sub> is prepared by heating Cu[Fe]<sub>2/3</sub> at 80 °C and 85 RH% for 72 h, confirming that the increase in interstitial water content is exclusive to Cu[Fe]<sub>2/3-c</sub>. Source data are provided as a Source Data file.

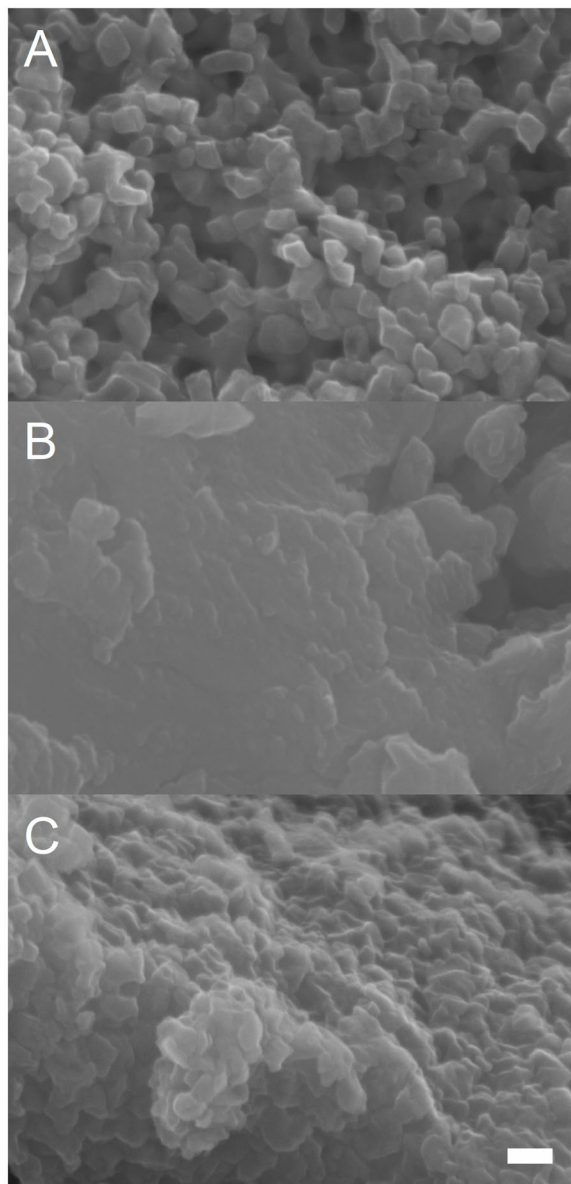

**Supplementary Figure 14.** SEM images at x100k magnification of (A) Cu[Fe]<sub>2/3</sub>, (B) Cu[Fe]<sub>2/3</sub>-g, and (C) Cu[Fe]<sub>2/3</sub>-c. Scale bar is 100 nm.

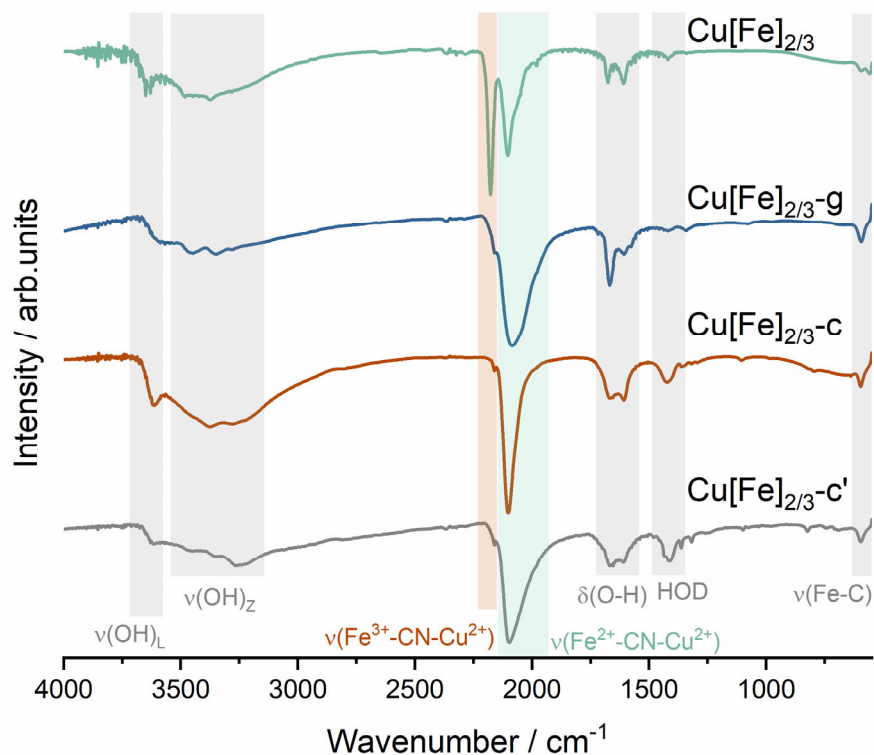

**Supplementary Figure 15.** FTIR spectra of Cu[Fe]<sub>2/3</sub>, Cu[Fe]<sub>2/3</sub>-g, Cu[Fe]<sub>2/3</sub>-c, and Cu[Fe]<sub>2/3</sub>-c'. Source data are provided as a Source Data file.

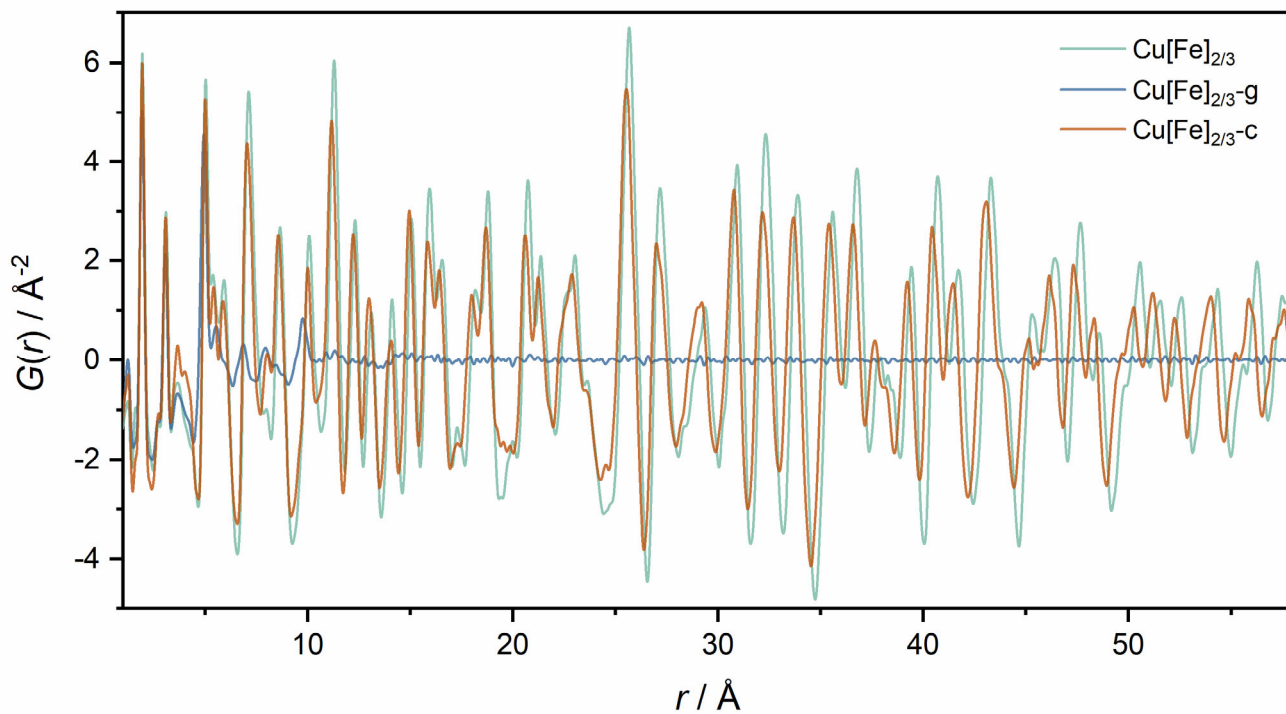

**Supplementary Figure 16.** Pair distribution function (PDF) of Cu[Fe]<sub>2/3</sub>, Cu[Fe]<sub>2/3</sub>-g, and Cu[Fe]<sub>2/3</sub>-c up to *r* of 58 Å. Source data are provided as a Source Data file.

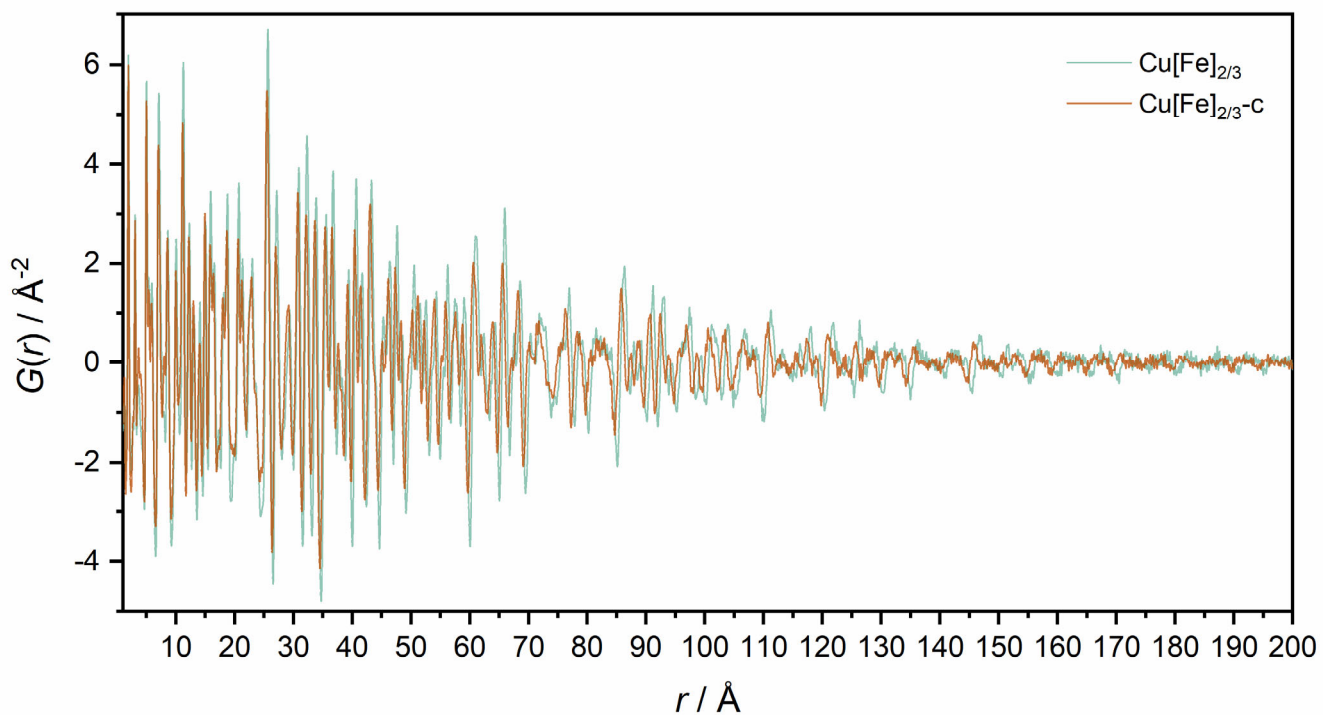

**Supplementary Figure 17.** Pair distribution function (PDF) of  $\text{Cu[Fe]}_{2/3}$  and  $\text{Cu[Fe]}_{2/3-c}$  up to  $r$  of 150 Å. Source data are provided as a Source Data file.

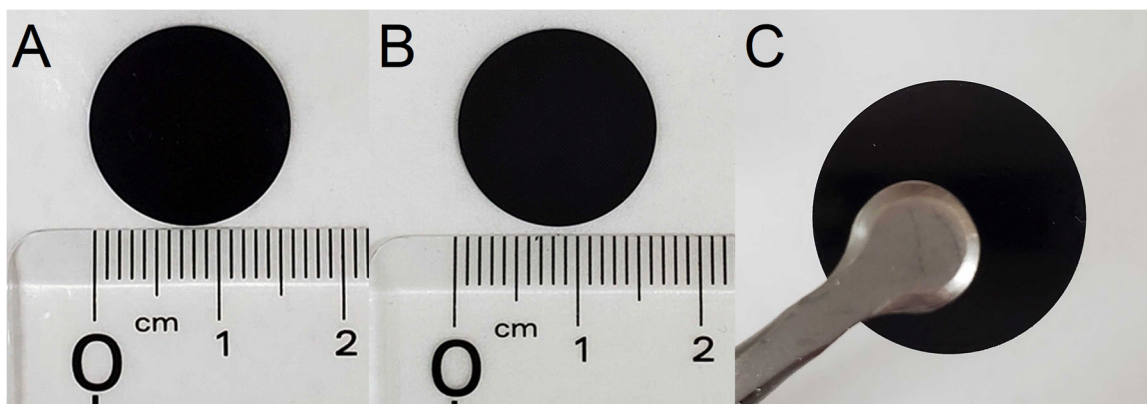

**Supplementary Figure 18.** Photographs of (A)  $\text{Cu[Fe]}_{2/3}$  and (B and C)  $\text{Cu[Fe]}_{2/3-g}$  thin monolith disks with a thickness of ca. 250  $\mu\text{m}$  and 16 mm in diameter. The monoliths were prepared via the hot-pressing technique.

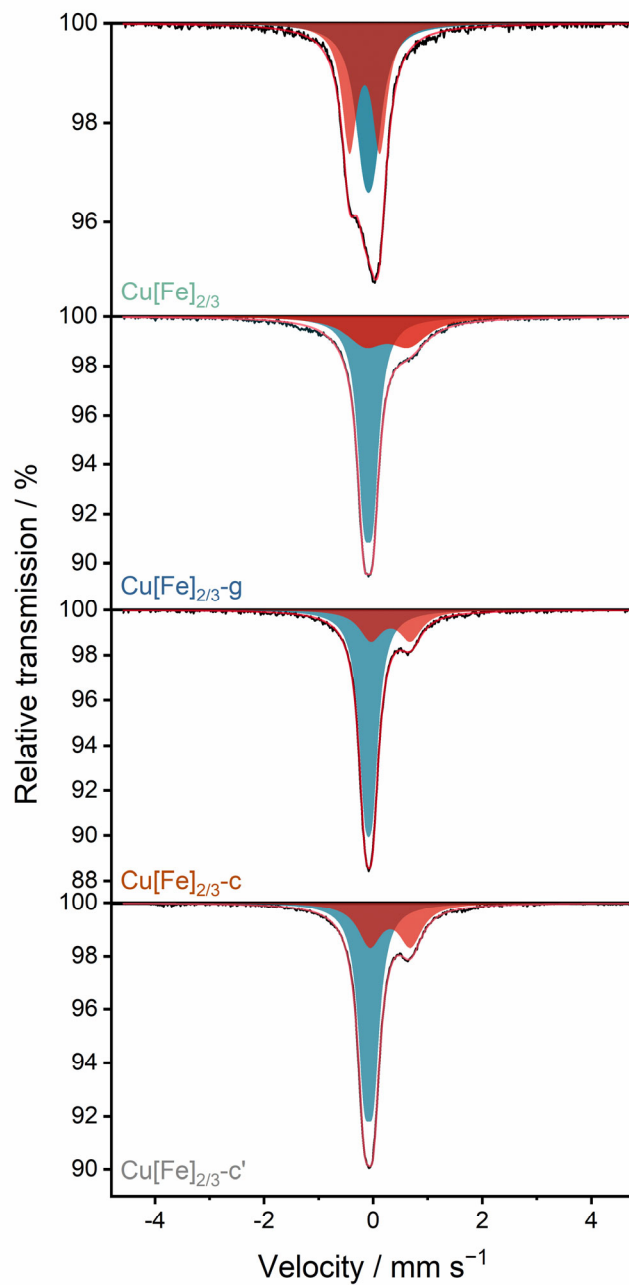

**Supplementary Figure 19.** <sup>57</sup>Fe Mössbauer spectra measured at room temperature of Cu[Fe]<sub>2/3</sub>, Cu[Fe]<sub>2/3-g</sub>, Cu[Fe]<sub>2/3-c</sub>, and Cu[Fe]<sub>2/3-c'</sub>. The blue and red fittings represent the contributions from Fe<sup>II</sup> and Fe<sup>III</sup>, respectively. Source data are provided as a Source Data file.



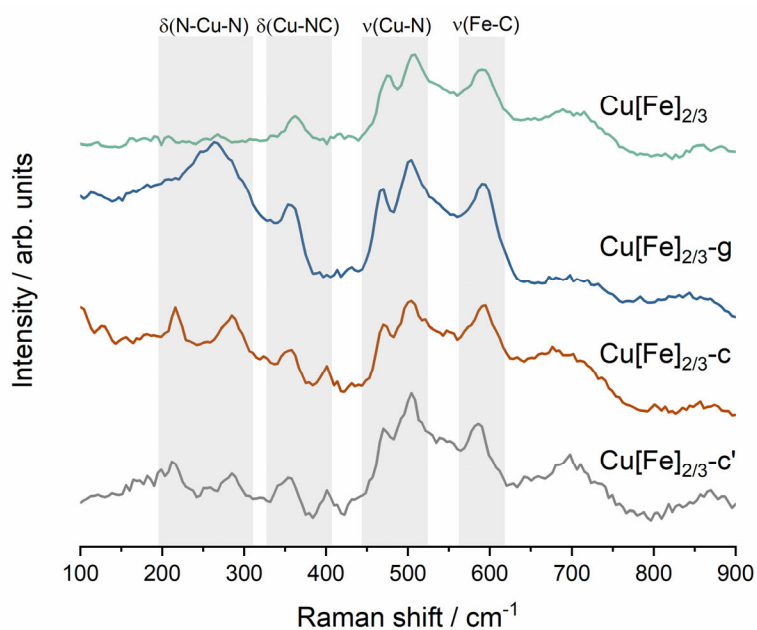

**Supplementary Figure 20.** Raman spectra of Cu[Fe]<sub>2/3</sub>, Cu[Fe]<sub>2/3</sub>-g, Cu[Fe]<sub>2/3</sub>-c, and Cu[Fe]<sub>2/3</sub>-c'. Source data are provided as a Source Data file.

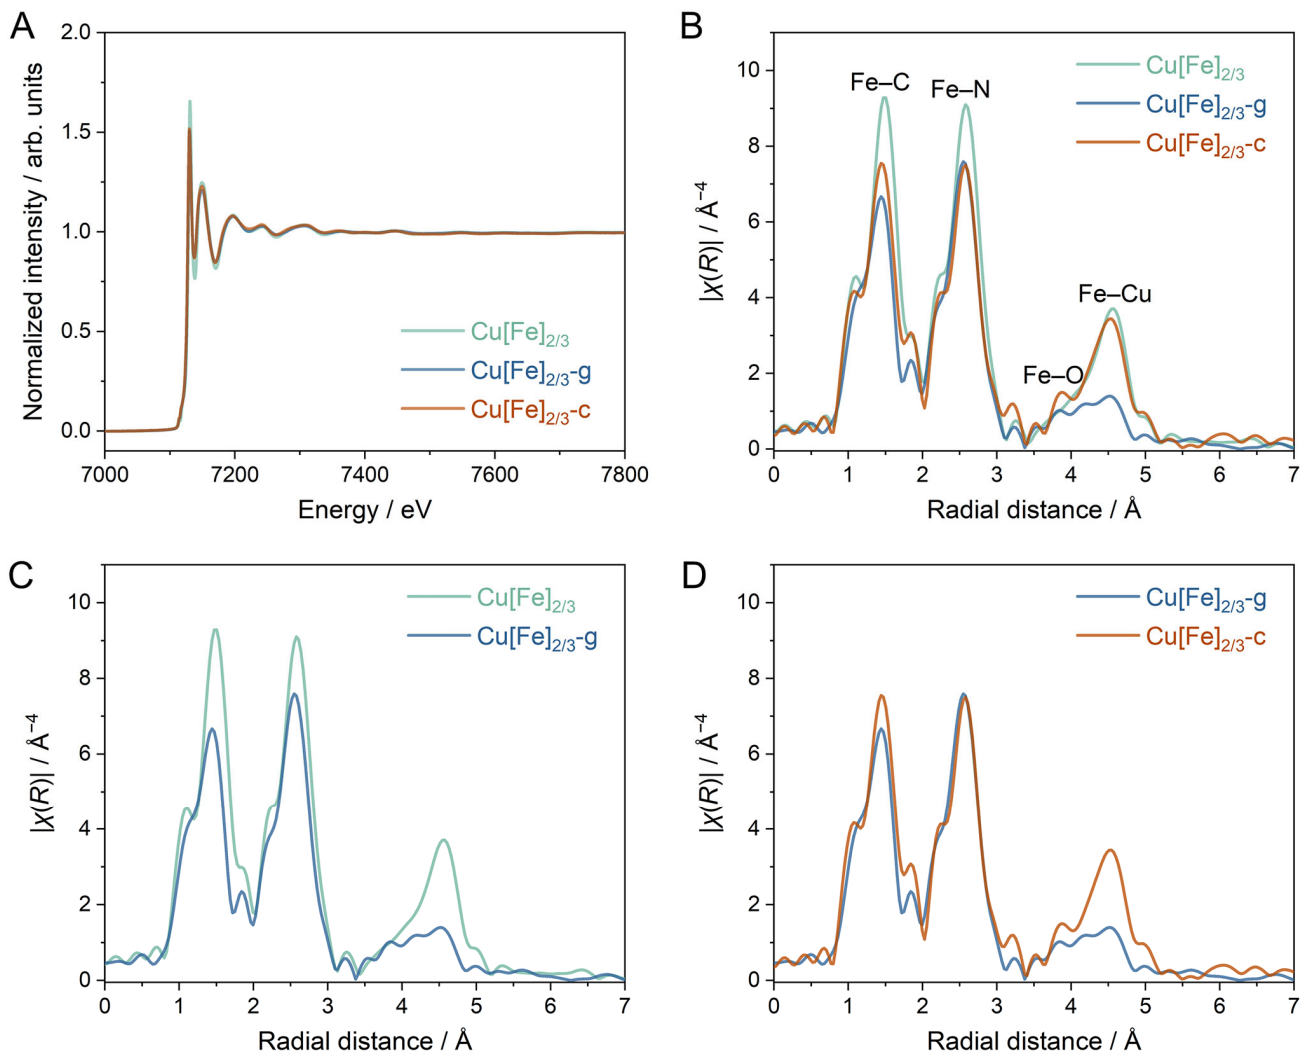

**Supplementary Figure 21.** (A) Normalised XAS spectra and (B) Fourier transform EXAFS at Fe K-edge of  $\text{Cu}[\text{Fe}]_{2/3}$ ,  $\text{Cu}[\text{Fe}]_{2/3\text{-g}}$ , and  $\text{Cu}[\text{Fe}]_{2/3\text{-c}}$ . Fourier transform EXAFS at Fe K-edge comparison between (C)  $\text{Cu}[\text{Fe}]_{2/3}$  –  $\text{Cu}[\text{Fe}]_{2/3\text{-g}}$  and (D)  $\text{Cu}[\text{Fe}]_{2/3\text{-g}}$  –  $\text{Cu}[\text{Fe}]_{2/3\text{-c}}$ . Source data are provided as a Source Data file.

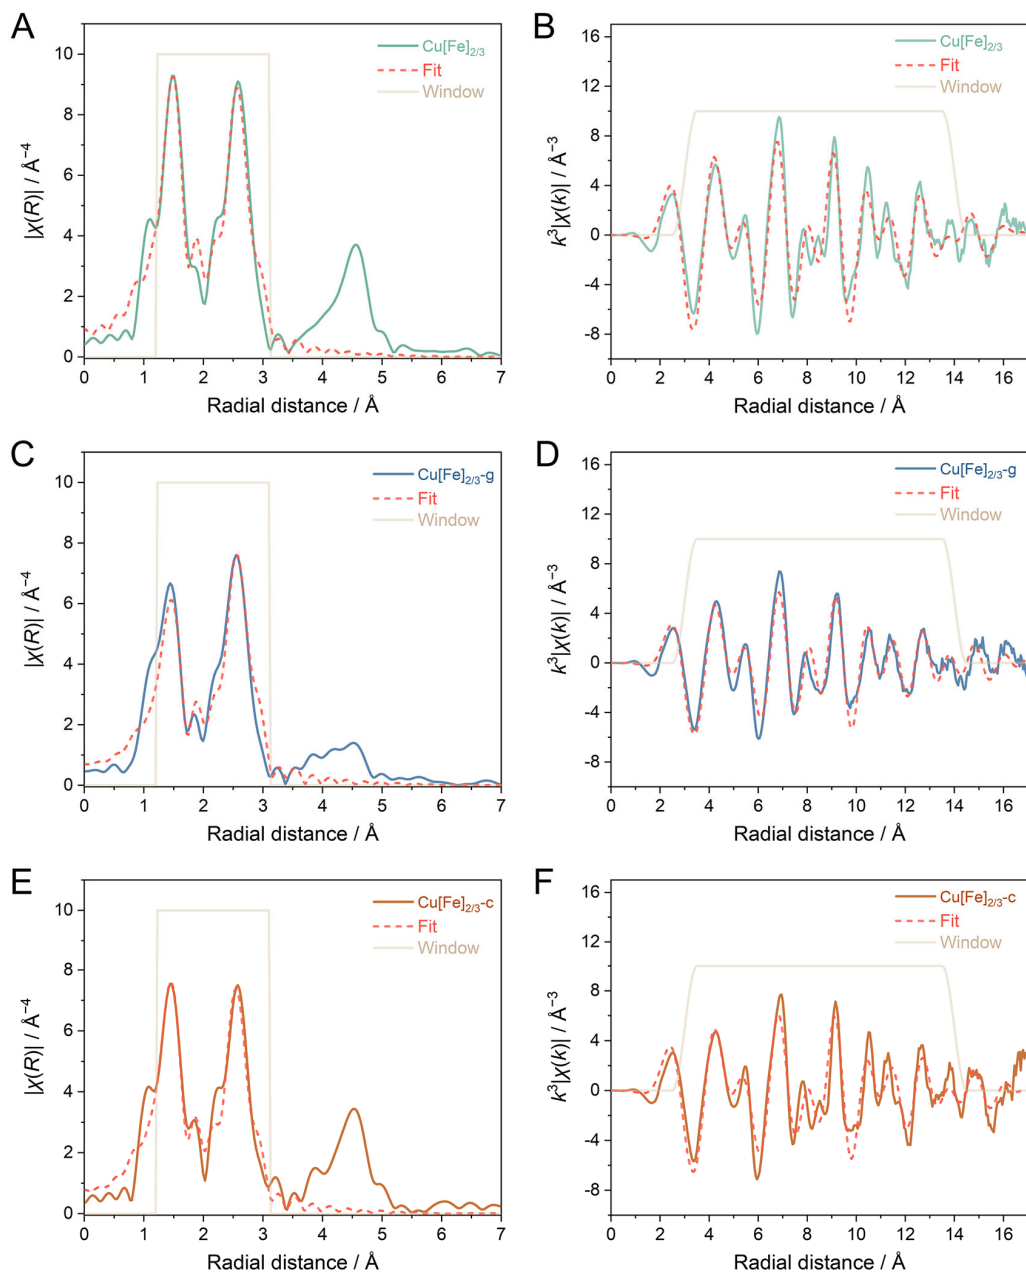

**Supplementary Figure 22.** Fourier transform and EXAFS functions at Fe K-edge for (A, B) Cu[Fe]<sub>2/3</sub>, (C, D) Cu[Fe]<sub>2/3-g</sub>, and (E, F) Cu[Fe]<sub>2/3-c</sub>. The fitting results show that the coordination numbers of Fe are 6.0, 4.4, and 5.4 for Cu[Fe]<sub>2/3</sub>, Cu[Fe]<sub>2/3-g</sub>, and Cu[Fe]<sub>2/3-c</sub>, respectively (Table S4). Source data are provided as a Source Data file.

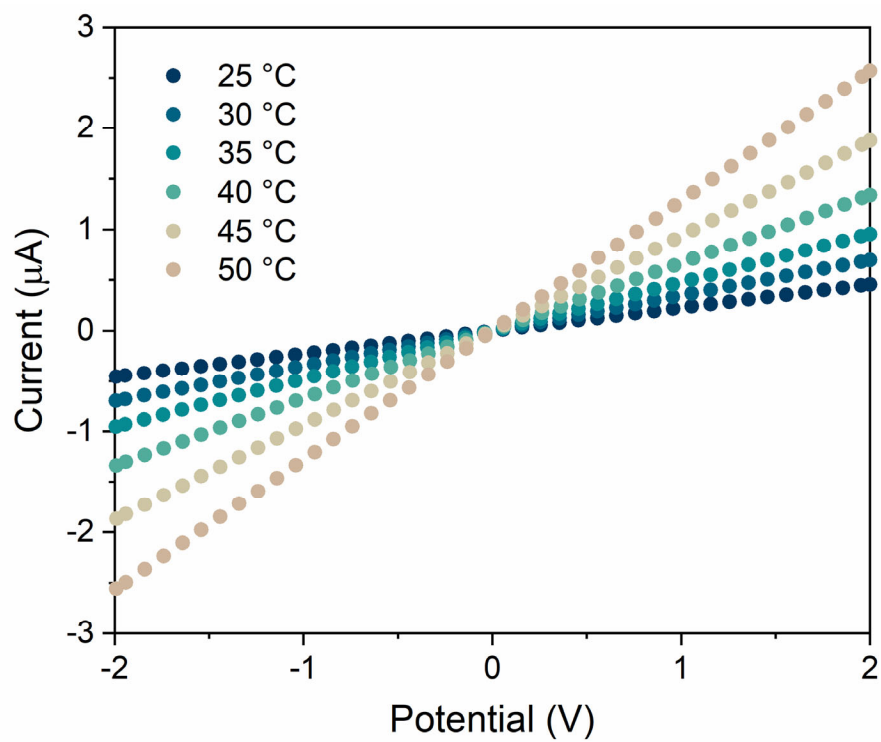

**Supplementary Figure 23.** Variable temperature I-V curve of Cu[Fe]<sub>2/3</sub> (L = 1.524 mm). Source data are provided as a Source Data file.

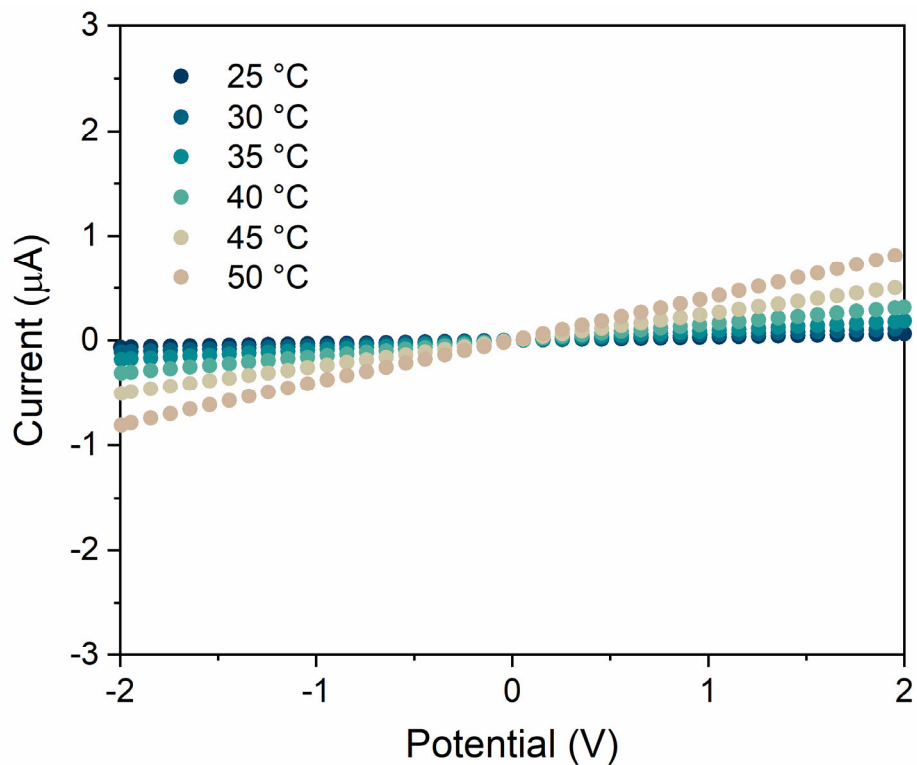

**Supplementary Figure 24.** Variable temperature I-V curve of  $\text{Cu}[\text{Fe}]_{2/3}\text{-g}$  ( $L = 1.469$  mm). Source data are provided as a Source Data file.

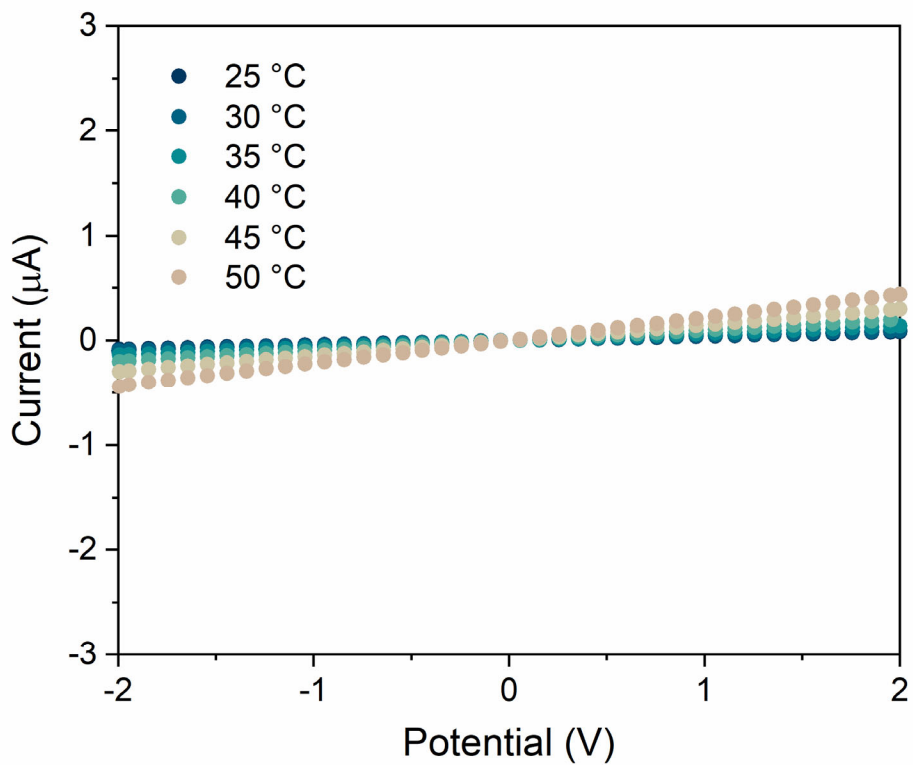

**Supplementary Figure 25.** Variable temperature I-V curve of  $\text{Cu}[\text{Fe}]_{2/3}\text{-c}'$  ( $L = 1.506$  mm). Source data are provided as a Source Data file.

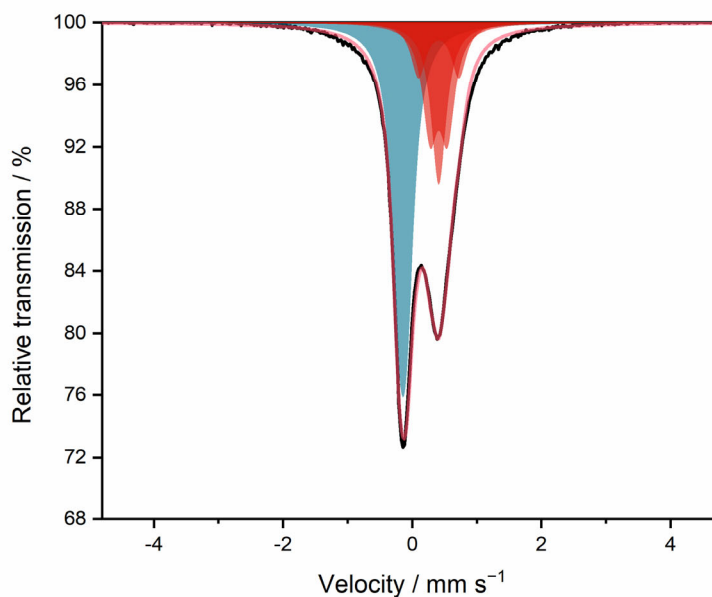

**Supplementary Figure 26.**  $^{57}\text{Fe}$  Mössbauer spectra measured at room temperature of  $\text{Fe}[\text{Fe}]_{3/4}$ . The blue and red fittings represent the contributions from low-spin  $\text{Fe}^{\text{II}}$  and high-spin  $\text{Fe}^{\text{III}}$ , respectively. The spectrum was analysed in terms of a single low-spin  $\text{Fe}^{\text{II}}$  quadrupole doublet and three high-spin  $\text{Fe}^{\text{III}}$  quadrupole doublets.<sup>1</sup> Source data are provided as a Source Data file.

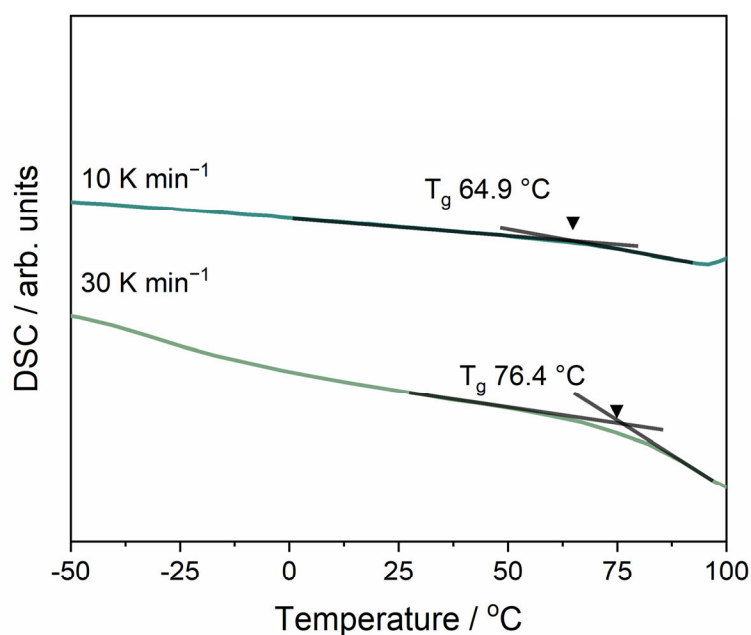

**Supplementary Figure 27.** DSC profile of  $\text{Fe}[\text{Fe}]_{3/4}\text{-g}$  after 144 h of mechanical milling. Source data are provided as a Source Data file.

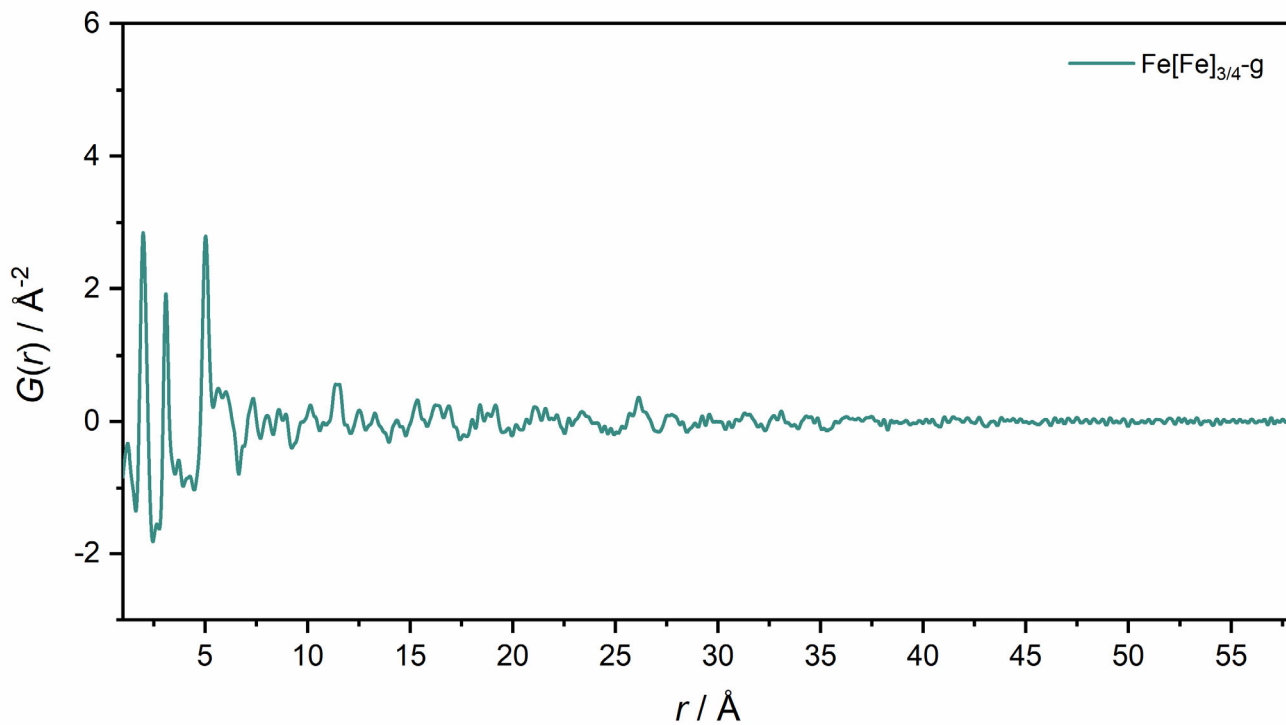

**Supplementary Figure 28.** Pair distribution function (PDF) of  $\text{Fe}[\text{Fe}]_{3/4-g}$  up to  $r$  of 58  $\text{\AA}$ . Source data are provided as a Source Data file.

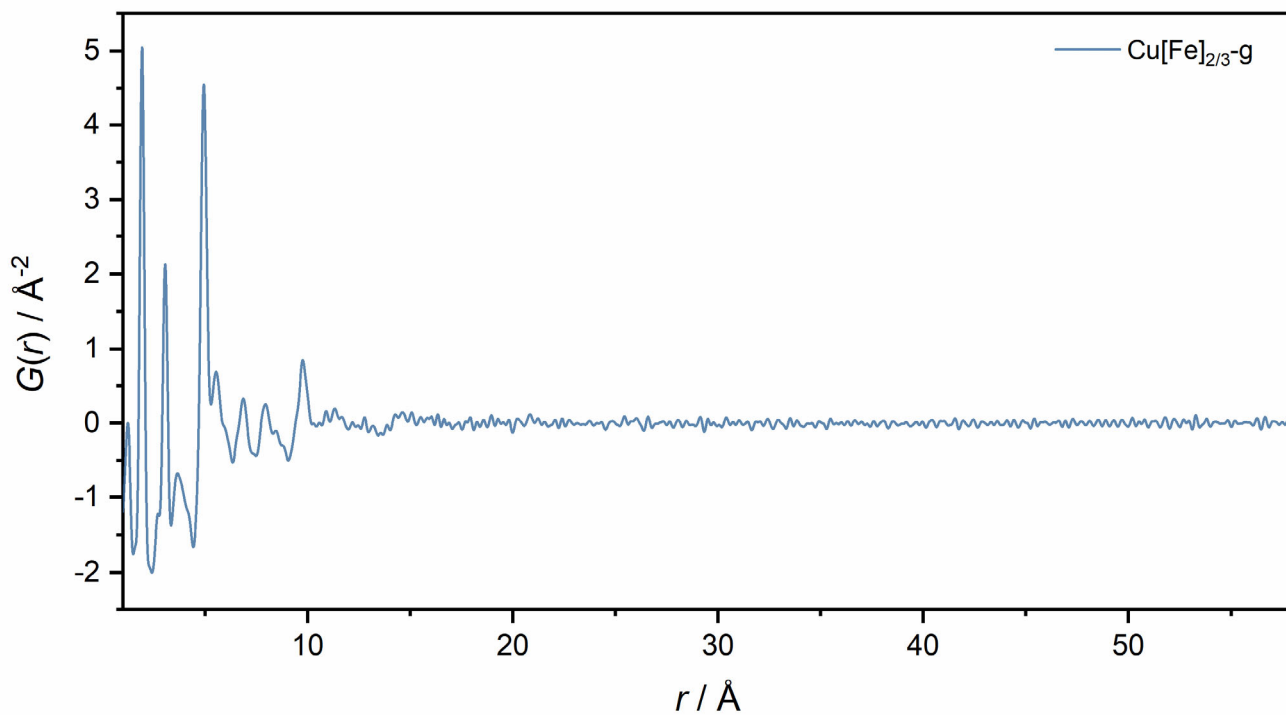

**Supplementary Figure 29.** Pair distribution function (PDF) of  $\text{Cu}[\text{Fe}]_{2/3-g}$  up to  $r$  of 58  $\text{\AA}$ . Source data are provided as a Source Data file.

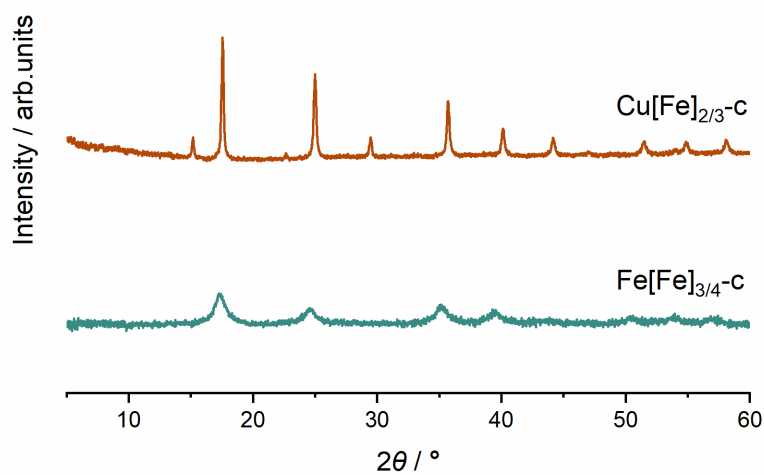

**Supplementary Figure 30.** PXR patterns of Cu[Fe]<sub>2/3</sub>-c and Fe[Fe]<sub>3/4</sub>-c ( $\lambda = 1.5406 \text{ \AA}$ ). Source data are provided as a Source Data file.

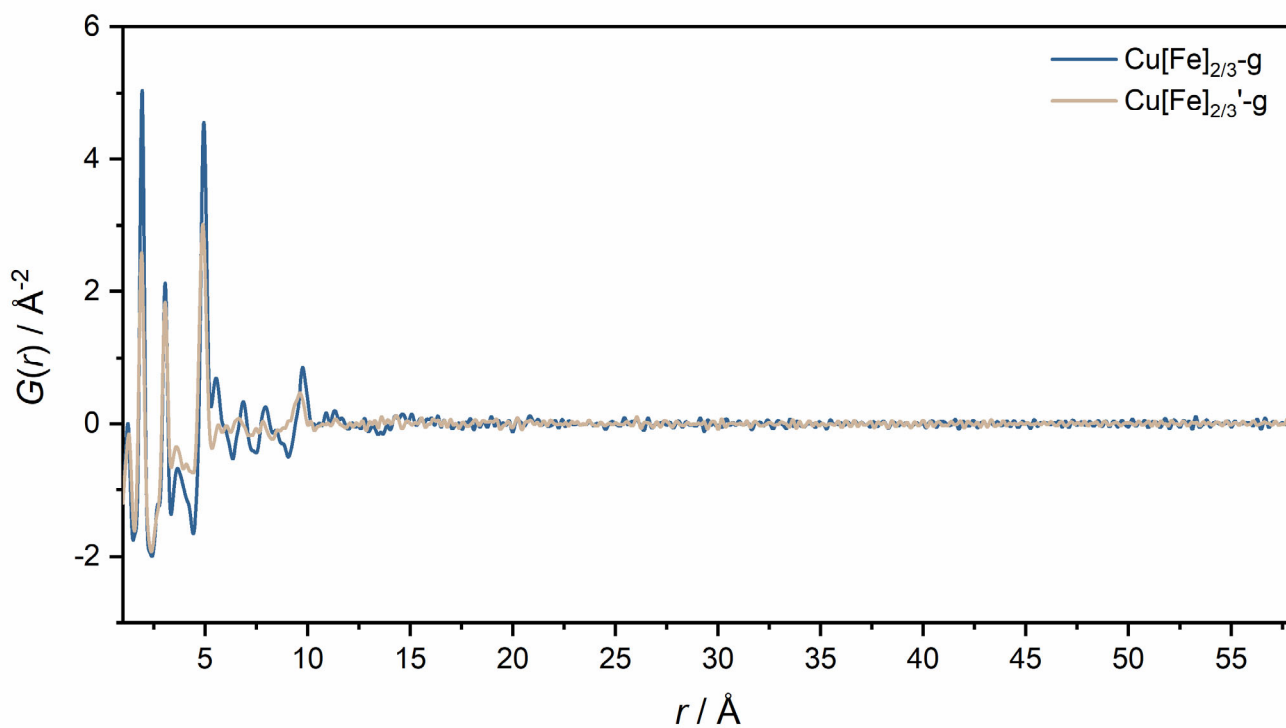

**Supplementary Figure 31.** Pair distribution functions (PDFs) of Cu[Fe]<sub>2/3</sub>-g and Cu[Fe]<sub>2/3</sub>'-g up to  $r$  of 58 Å. Source data are provided as a Source Data file.



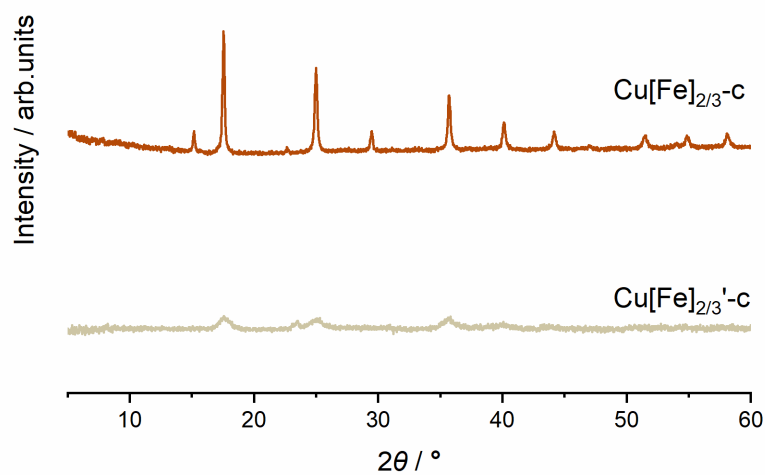

**Supplementary Figure 32.** PXR patterns of  $\text{Cu[Fe]}_{2/3}\text{-c}$  and  $\text{Cu[Fe]}_{2/3}'\text{-c}$  ( $\lambda = 1.5406 \text{ \AA}$ ). Source data are provided as a Source Data file.

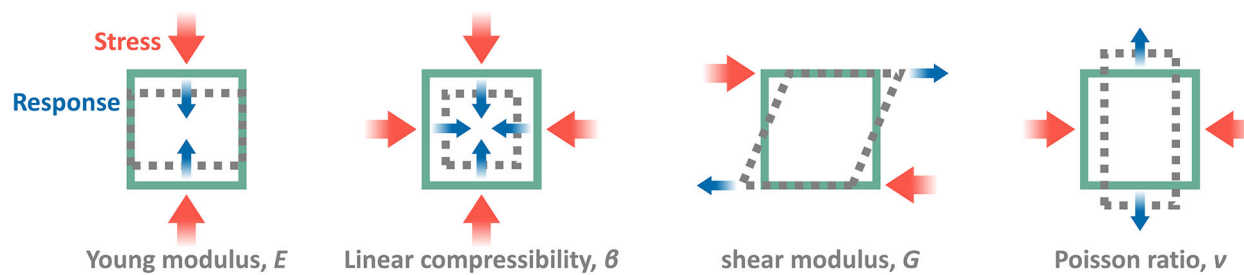

**Supplementary Figure 33.** Schematic illustration of the directional elastic properties of materials in 2D space.

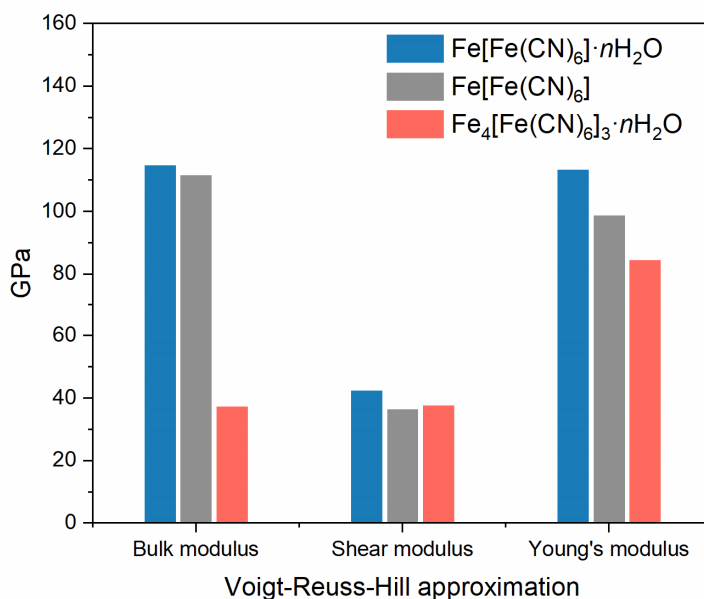

**Supplementary Figure 34.** Bulk, shear, and Young's moduli comparison of  $\text{Fe}[\text{Fe}(\text{CN})_6] \cdot n\text{H}_2\text{O}$ ,  $\text{Fe}[\text{Fe}(\text{CN})_6]$ , and  $\text{Fe}_4[\text{Fe}(\text{CN})_6]_3 \cdot n\text{H}_2\text{O}$  at 0 GPa by Voigt-Reuss-Hill approximation. Source data are provided as a Source Data file.

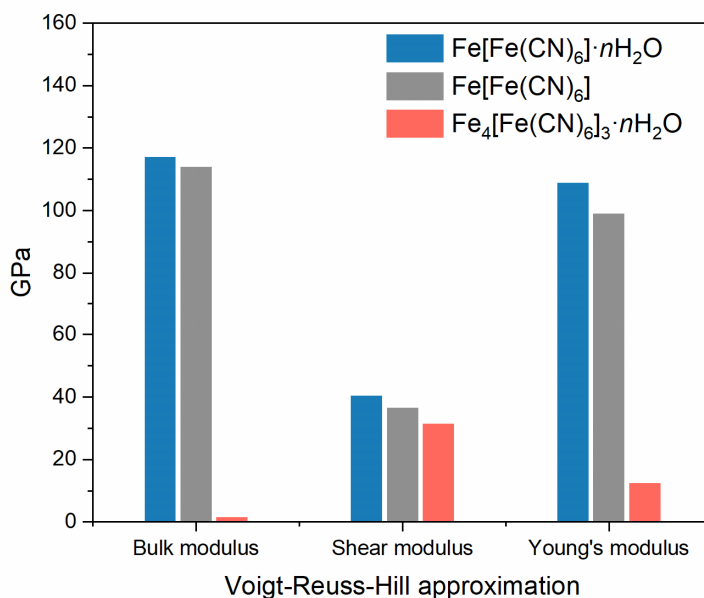

**Supplementary Figure 35.** Bulk, shear, and Young's moduli comparison of  $\text{Fe}[\text{Fe}(\text{CN})_6] \cdot n\text{H}_2\text{O}$ ,  $\text{Fe}[\text{Fe}(\text{CN})_6]$ , and  $\text{Fe}_4[\text{Fe}(\text{CN})_6]_3 \cdot n\text{H}_2\text{O}$  at 0.2 GPa by Voigt-Reuss-Hill approximation. Note, the  $\text{Fe}_4[\text{Fe}(\text{CN})_6]_3 \cdot n\text{H}_2\text{O}$  is considered unstable according to the Eigenvalue analysis. Source data are provided as a Source Data file.

## Spatial elastic

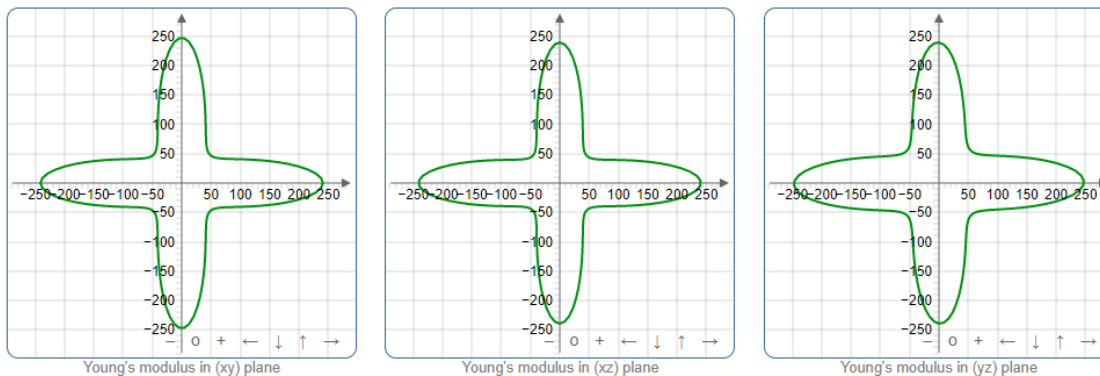

**Supplementary Figure 36.** Spatial dependence Young's modulus of the  $\text{Fe}[\text{Fe}(\text{CN})_6] \cdot n\text{H}_2\text{O}$  at 0 GPa. Source data are provided as a Source Data file.

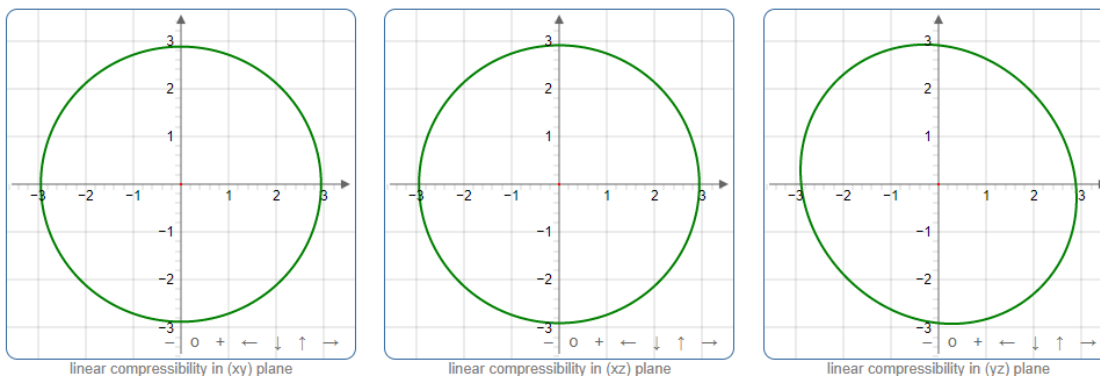

**Supplementary Figure 37.** Spatial dependence linear compressibility of the  $\text{Fe}[\text{Fe}(\text{CN})_6] \cdot n\text{H}_2\text{O}$  at 0 GPa. Source data are provided as a Source Data file.

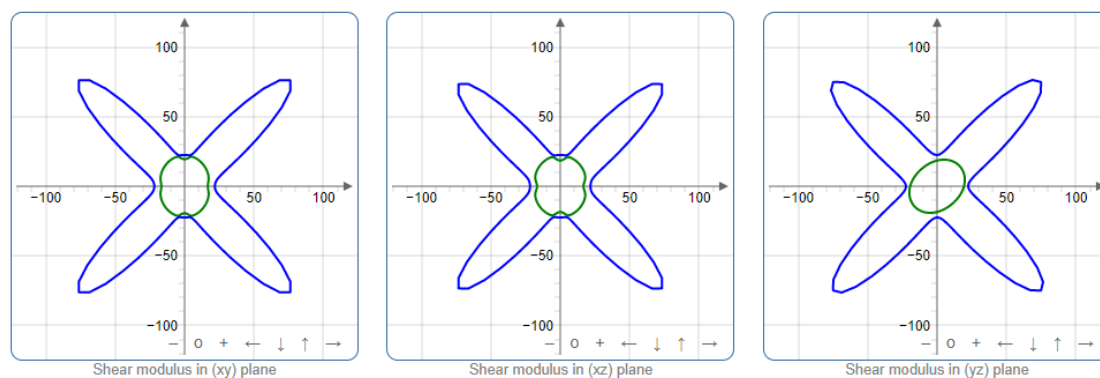

**Supplementary Figure 38.** Spatial dependence shear modulus of the  $\text{Fe}[\text{Fe}(\text{CN})_6] \cdot n\text{H}_2\text{O}$  at 0 GPa. Blue and green curves/surfaces represent maximum and positive minimum shear moduli, respectively. Source data are provided as a Source Data file.

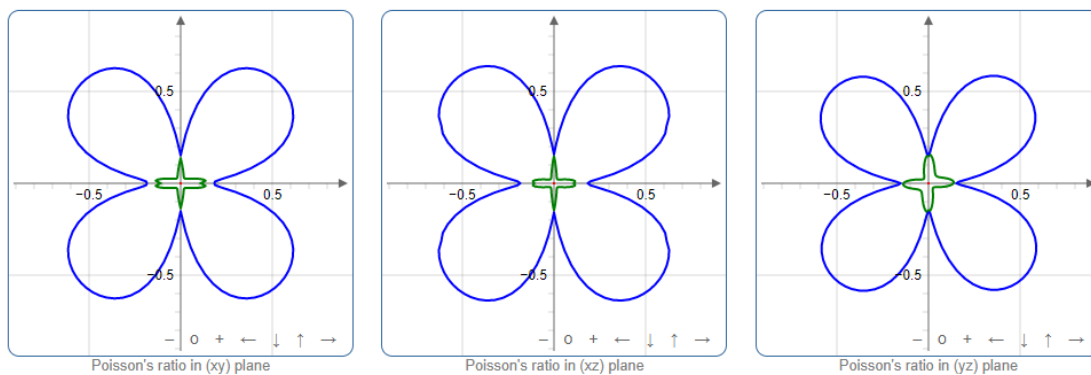

**Supplementary Figure 39.** Spatial dependence Poisson's ratio of the  $\text{Fe}[\text{Fe}(\text{CN})_6] \cdot n\text{H}_2\text{O}$  at 0 GPa. Blue, green, and red curves/surfaces represent maximum, positive minimum, and negative minimum Poisson's ratios, respectively. Source data are provided as a Source Data file.

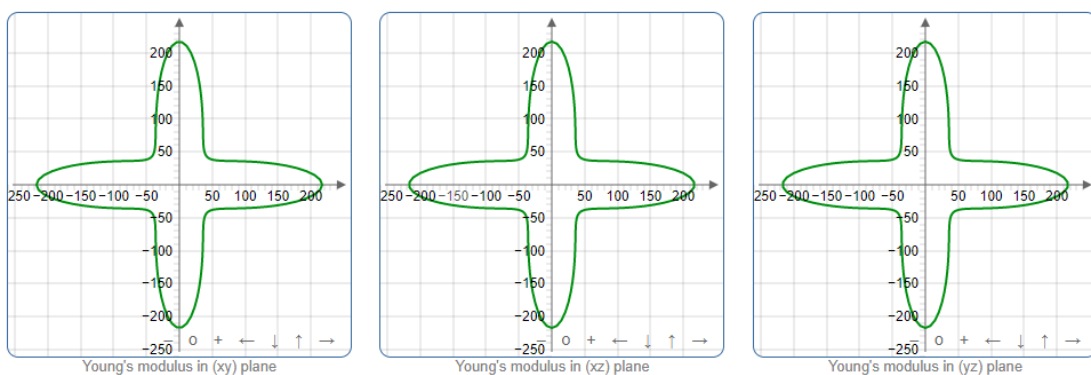

**Supplementary Figure 40.** Spatial dependence Young's modulus of the  $\text{Fe}[\text{Fe}(\text{CN})_6]$  at 0 GPa. Source data are provided as a Source Data file.

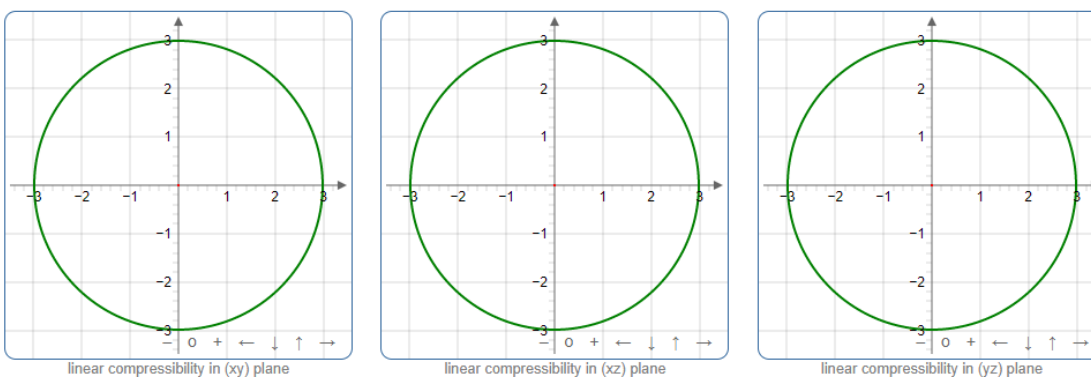

**Supplementary Figure 41.** Spatial dependence linear compressibility of the  $\text{Fe}[\text{Fe}(\text{CN})_6]$  at 0 GPa. Source data are provided as a Source Data file.

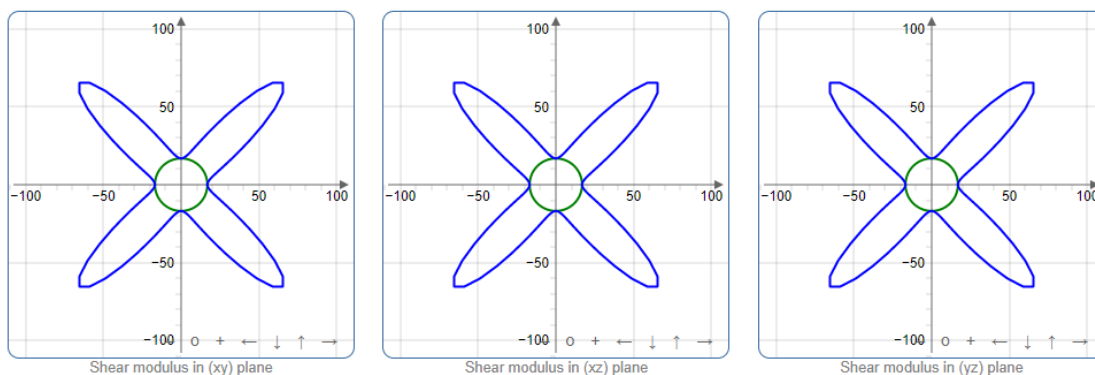

**Supplementary Figure 42.** Spatial dependence shear modulus of the  $\text{Fe}[\text{Fe}(\text{CN})_6]$  at 0 GPa. Blue and green curves/surfaces represent maximum and positive minimum shear moduli, respectively. Source data are provided as a Source Data file.

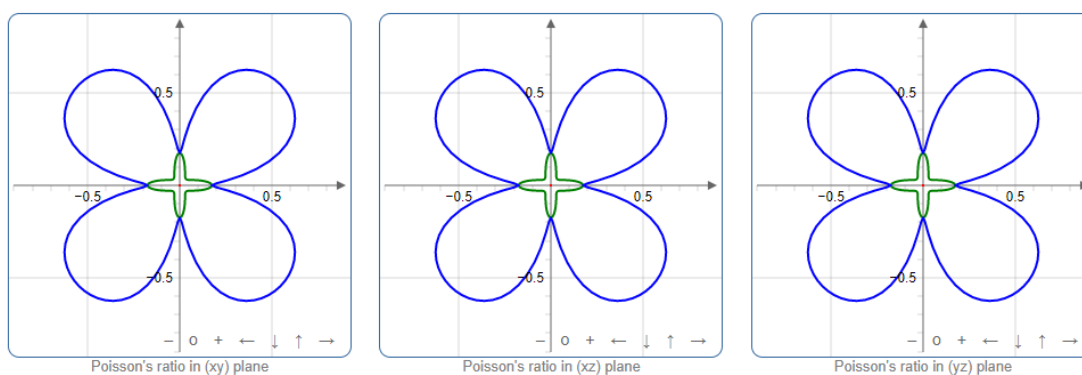

**Supplementary Figure 43.** Spatial dependence Poisson's ratio of the  $\text{Fe}[\text{Fe}(\text{CN})_6]$  at 0 GPa. Blue, green, and red curves/surfaces represent maximum, positive minimum, and negative minimum Poisson's ratios, respectively. Source data are provided as a Source Data file.

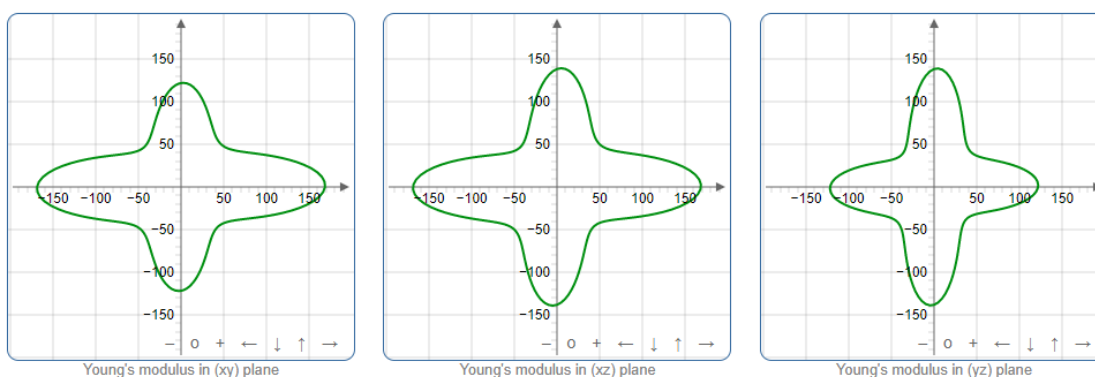

**Supplementary Figure 44.** Spatial dependence Young's modulus of the  $\text{Fe}_4[\text{Fe}(\text{CN})_6]_3 \cdot n\text{H}_2\text{O}$  at 0 GPa. Source data are provided as a Source Data file.

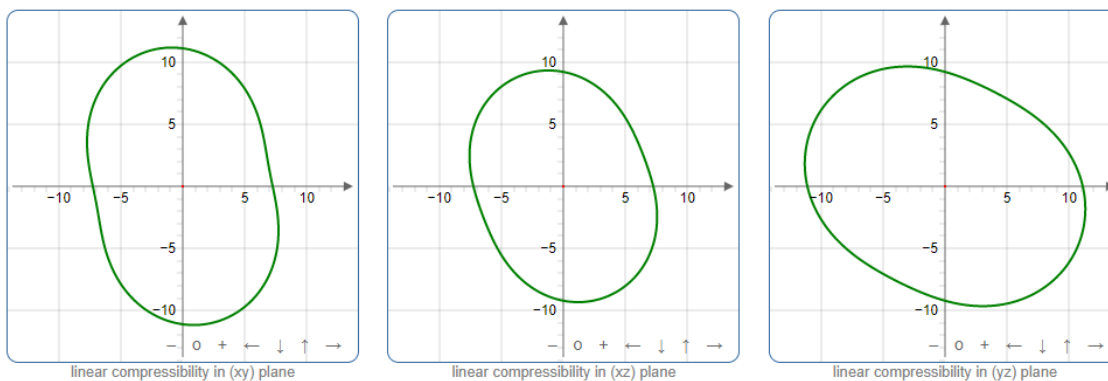

**Supplementary Figure 45.** Spatial dependence linear compressibility of the  $\text{Fe}_4[\text{Fe}(\text{CN})_6]_3 \cdot n\text{H}_2\text{O}$  at 0 GPa. Source data are provided as a Source Data file.

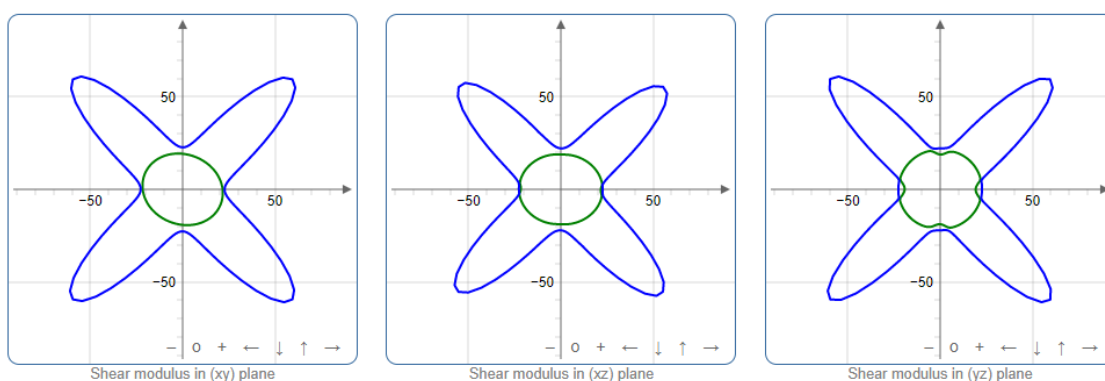

**Supplementary Figure 46.** Spatial dependence shear modulus of the  $\text{Fe}_4[\text{Fe}(\text{CN})_6]_3 \cdot n\text{H}_2\text{O}$  at 0 GPa. Blue and green curves/surfaces represent maximum and positive minimum shear moduli, respectively. Source data are provided as a Source Data file.

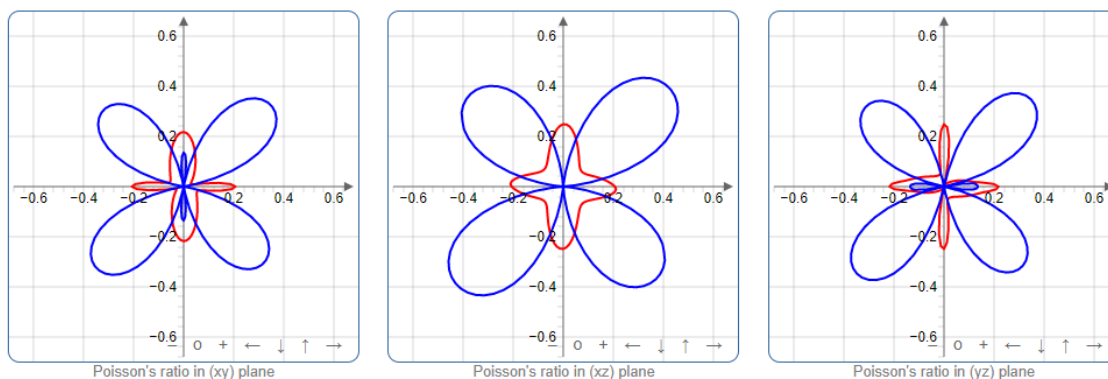

**Supplementary Figure 47.** Spatial dependence Poisson's ratio of the  $\text{Fe}_4[\text{Fe}(\text{CN})_6]_3 \cdot n\text{H}_2\text{O}$  at 0 GPa. Blue, green, and red curves/surfaces represent maximum, positive minimum, and negative minimum Poisson's ratios, respectively. Source data are provided as a Source Data file.

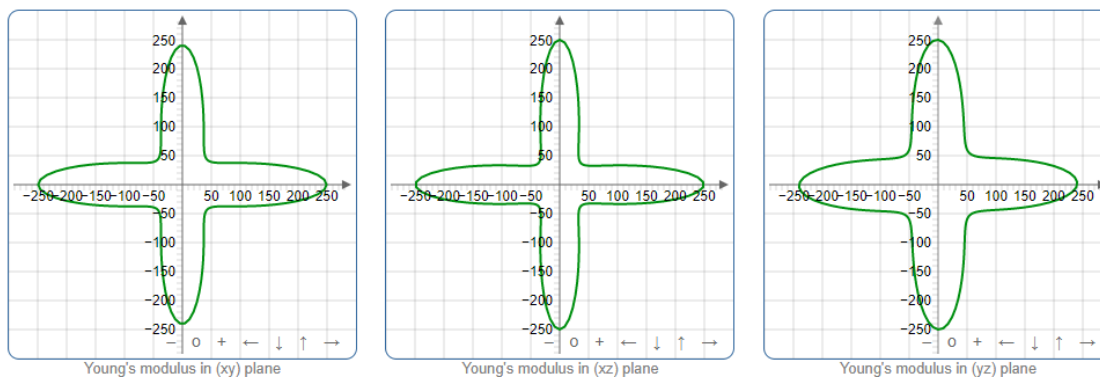

**Supplementary Figure 48.** Spatial dependence Young's modulus of the  $\text{Fe}[\text{Fe}(\text{CN})_6] \cdot n\text{H}_2\text{O}$  at 0.2 GPa. Source data are provided as a Source Data file.

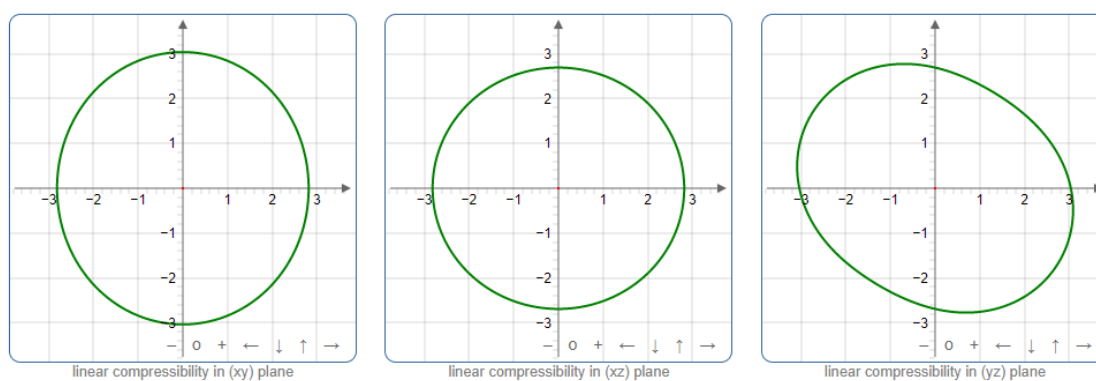

**Supplementary Figure 49.** Spatial dependence linear compressibility of the  $\text{Fe}[\text{Fe}(\text{CN})_6] \cdot n\text{H}_2\text{O}$  at 0.2 GPa. Source data are provided as a Source Data file.

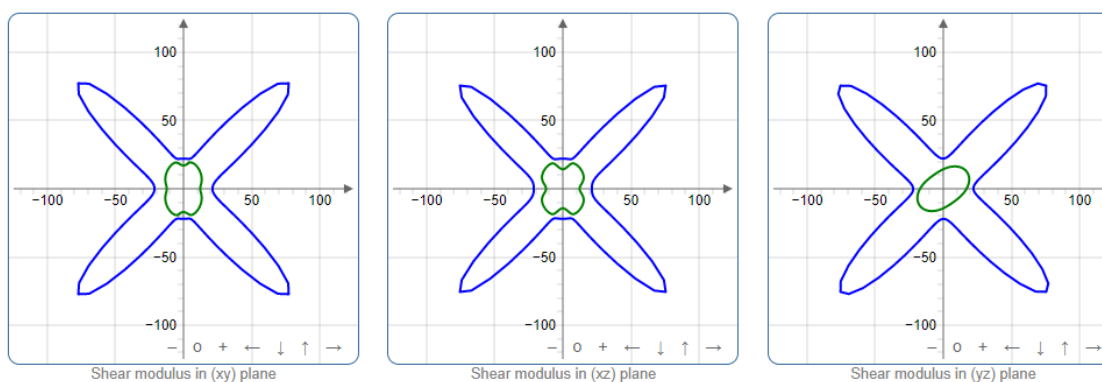

**Supplementary Figure 50.** Spatial dependence shear modulus of the  $\text{Fe}[\text{Fe}(\text{CN})_6] \cdot n\text{H}_2\text{O}$  at 0.2 GPa. Blue and green curves/surfaces represent maximum and positive minimum shear moduli, respectively. Source data are provided as a Source Data file.

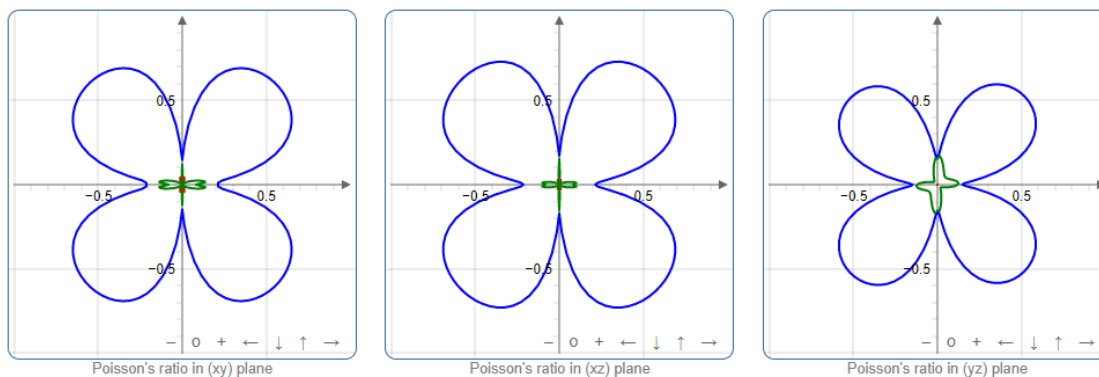

**Supplementary Figure 51.** Spatial dependence Poisson's ratio of the  $\text{Fe}[\text{Fe}(\text{CN})_6] \cdot n\text{H}_2\text{O}$  at 0.2 GPa. Blue, green, and red curves/surfaces represent maximum, positive minimum, and negative minimum Poisson's ratios, respectively. Source data are provided as a Source Data file.

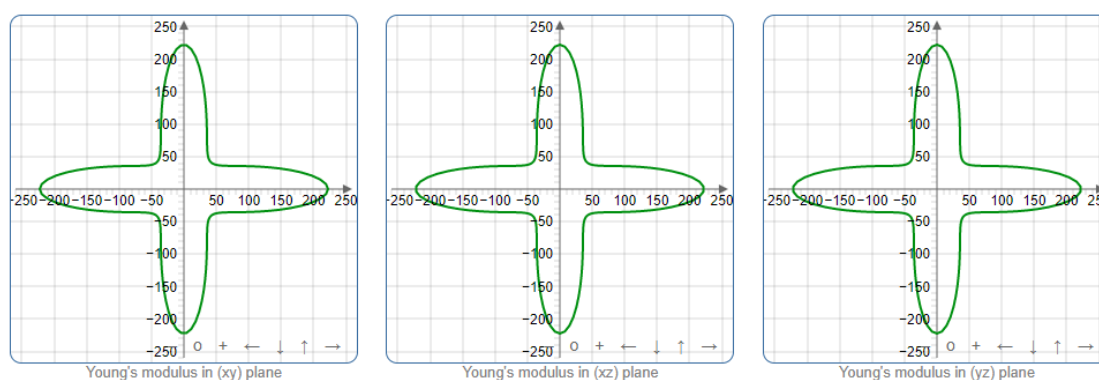

**Supplementary Figure 52.** Spatial dependence Young's modulus of the  $\text{Fe}[\text{Fe}(\text{CN})_6]$  at 0.2 GPa. Source data are provided as a Source Data file.

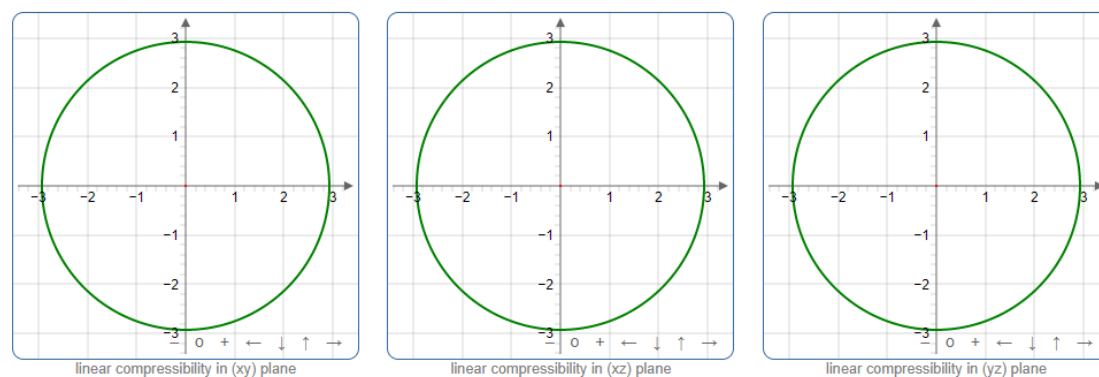

**Supplementary Figure 53.** Spatial dependence linear compressibility of the  $\text{Fe}[\text{Fe}(\text{CN})_6]$  at 0.2 GPa. Source data are provided as a Source Data file.



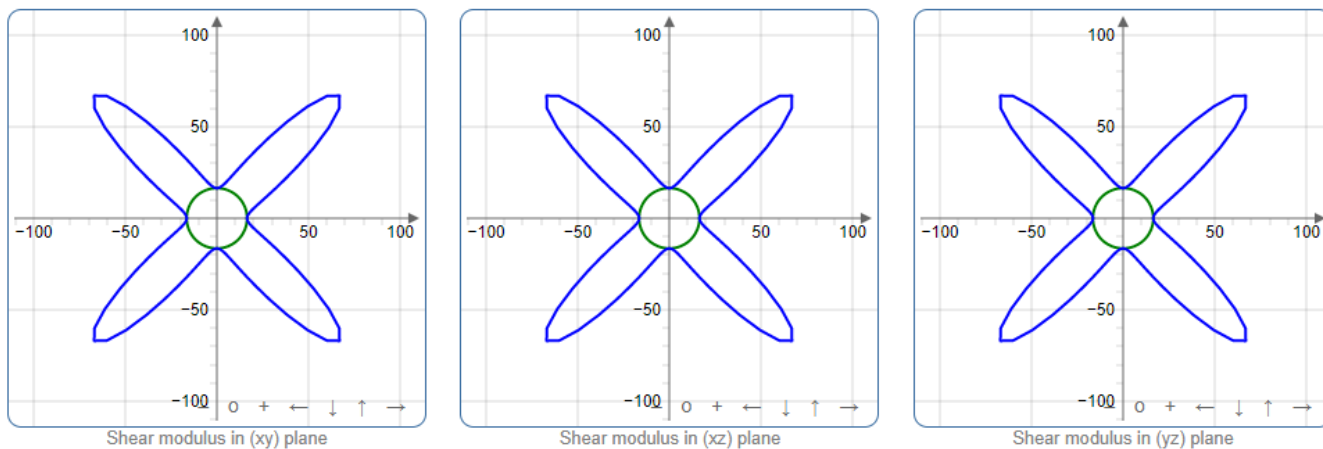

**Supplementary Figure 54.** Spatial dependence shear modulus of the  $\text{Fe}[\text{Fe}(\text{CN})_6]$  at 0.2 GPa. Blue and green curves/surfaces represent maximum and positive minimum shear moduli, respectively. Source data are provided as a Source Data file.

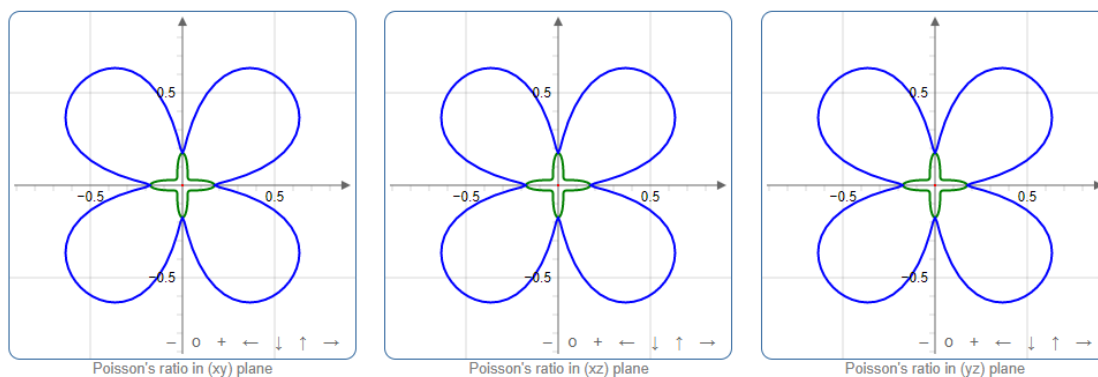

**Supplementary Figure 55.** Spatial dependence Poisson's ratio of the  $\text{Fe}[\text{Fe}(\text{CN})_6]$  at 0.2 GPa. Blue, green, and red curves/surfaces represent maximum, positive minimum, and negative minimum Poisson's ratios, respectively. Source data are provided as a Source Data file.

## Supplementary Reference

1. Grandjean, F., Samain, L. & Long, G.J. Characterization and utilization of Prussian blue and its pigments. *Dalton Trans.* **45**, 18018–18044 (2016).
